# Supplementary material for: The Effect of New Thiophene-Derived Diphenyl Aminophosphonates on Growth of Terrestrial Plants
Source: MDPI journal article supplement (doi:10.3390/ma12122018), 2019-06-24

# The Effect of New Thiophene-Derived Diphenyl Aminophosphonates on Growth of Terrestrial Plants

Diana Rogacz <sup>1</sup>, Jarosław Lewkowski <sup>2,\*</sup>, Marta Siedlarek<sup>2</sup>, Rafał Karpowicz<sup>2</sup>, Anna Kowalczyk<sup>2</sup> and Piotr Rychter <sup>1,\*</sup>

<sup>1</sup>*Faculty of Mathematics and Natural Science, Jan Długosz University in Częstochowa, 42-200 Częstochowa, 13/15 Armii Krajowej Av., Poland; diana.rogacz@gmail.com (D.R.)*

<sup>2</sup>*Department of Organic Chemistry, Faculty of Chemistry, University of Łódź, Tamka 12, 91-403 Łódź, Poland; mz.morawska@gmail.com (M.S.); rafalkarpowicz@gmail.com (R.K.)*

\*Correspondence: jaroslaw.lewkowski@chemia.uni.lodz.pl (J.L.); p.rychter@ajd.czyst.pl (P.R.); Tel.: +48-42-635-5751 (J.L.); +48-34-361-5154 (P.R.)

**Supplementary Material part 1**

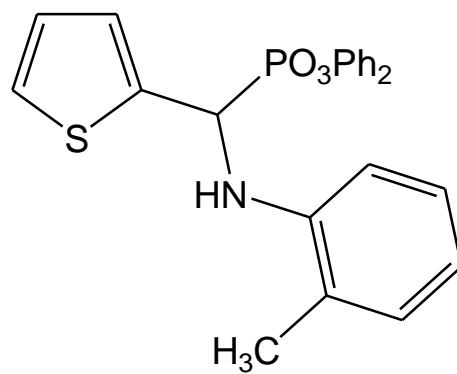

Fig. S1.  $^1\text{H}$  NMR,  $^{13}\text{C}$  NMR,  $^{31}\text{P}$  NMR spectra of diphenyl N-(2-methylphenyl)amino(2-thienyl)methylphosphonate (**1**)

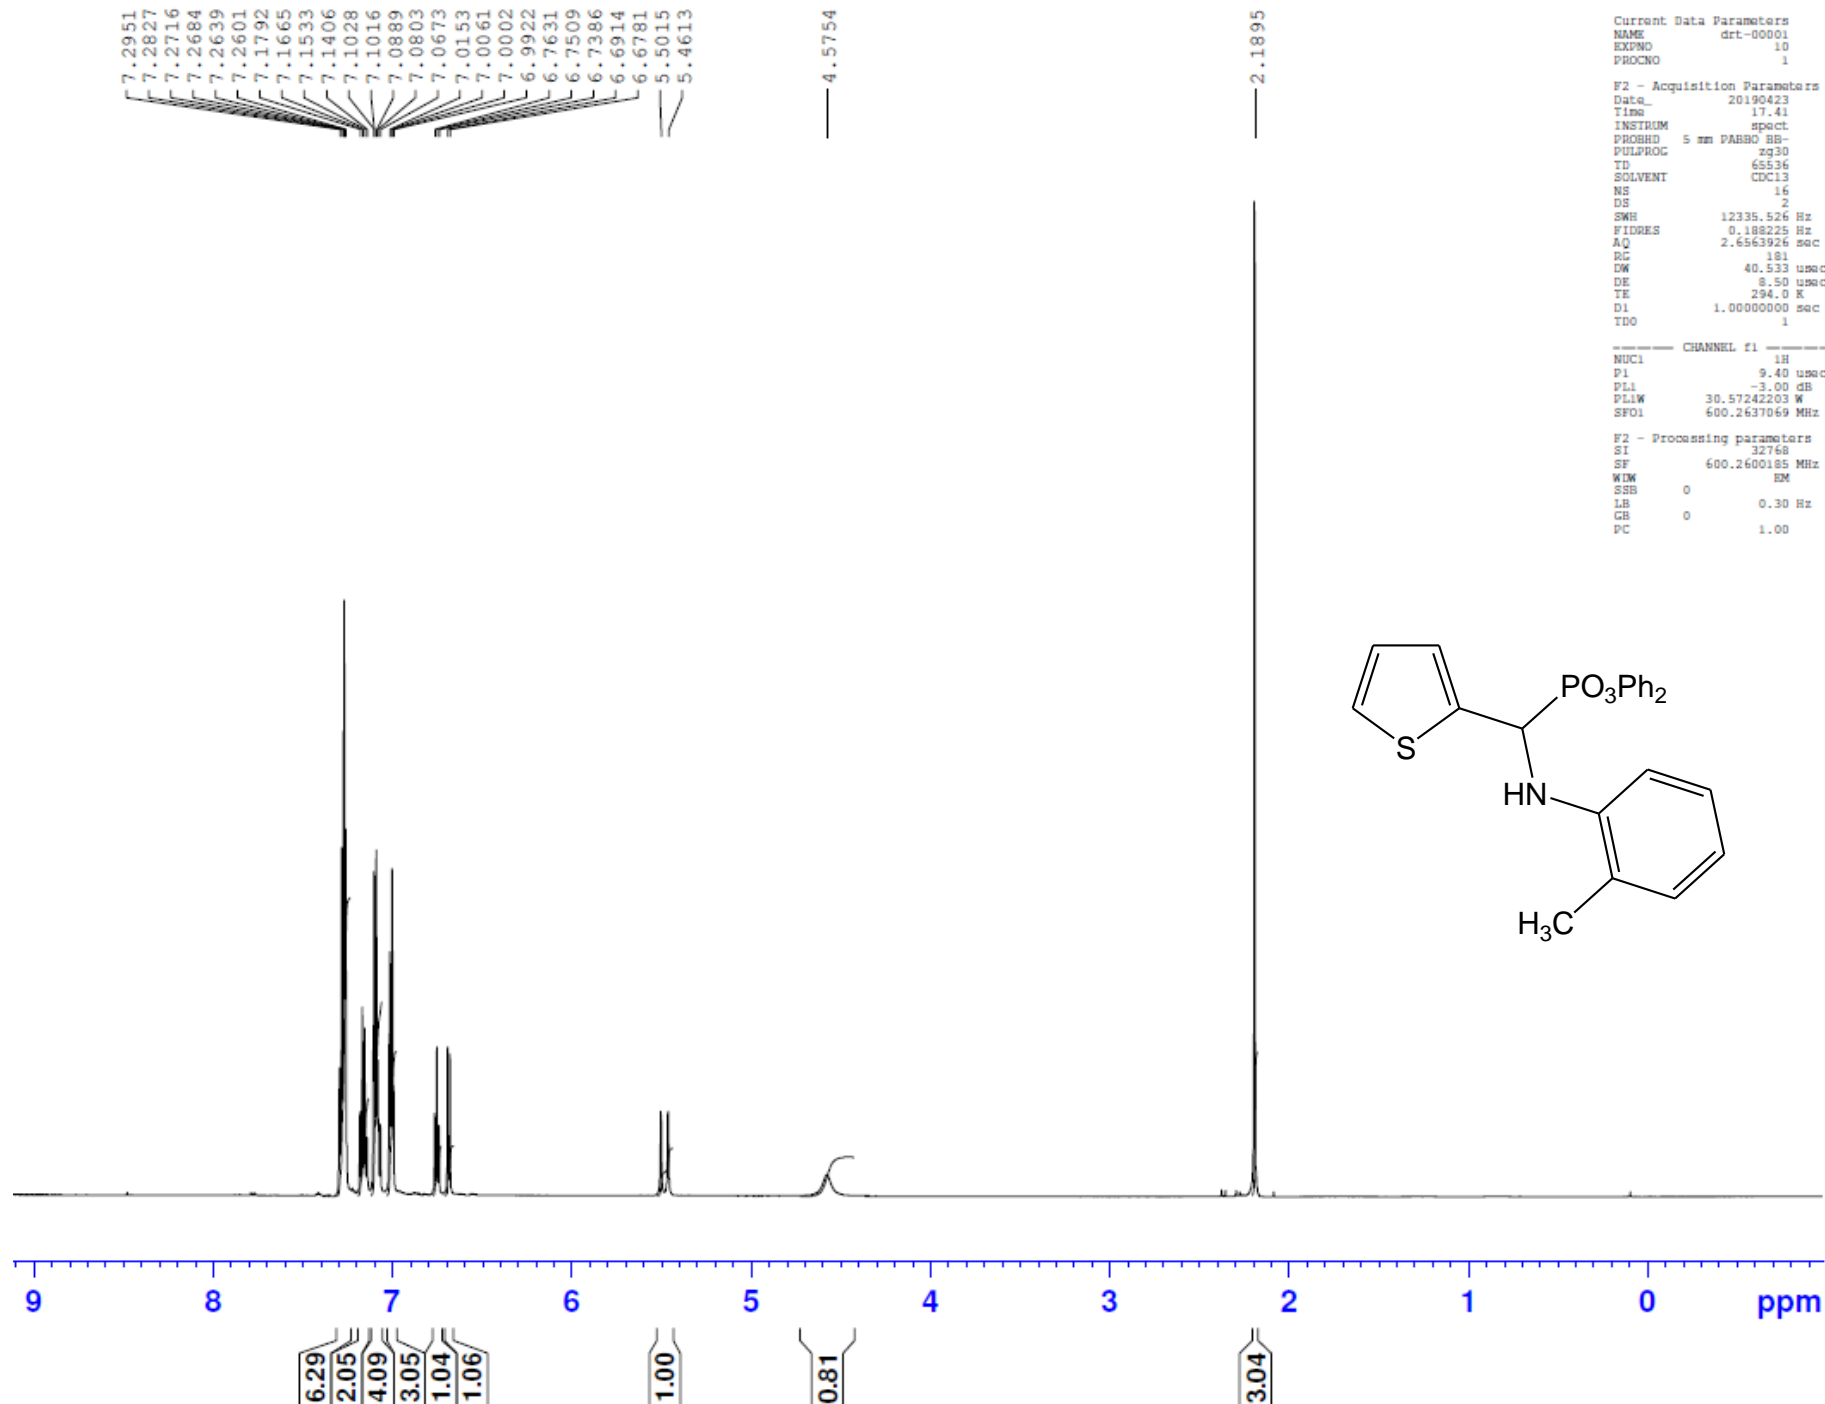

Current Data Parameters  
NAME drt-00001  
EXPNO 10  
PROCNO 1

F2 - Acquisition Parameters  
Date\_ 20190423  
Time 17.41  
INSTRUM spect  
PROBHD 5 mm PABBO BB-  
PULPROG zg30  
TD 65536  
SOLVENT CDC13  
NS 16  
DS 2  
SWH 12335.526 Hz  
FIDRES 0.188225 Hz  
AQ 2.6563926 sec  
RG 181  
DW 40.533 usec  
DE 8.50 usec  
TE 294.0 K  
D1 1.00000000 sec  
TD0 1

CHANNEL f1  
NUC1 1H  
P1 9.40 usec  
PL1 -3.00 dB  
PLW 30.57242203 W  
SFO1 600.2637069 MHz

F2 - Processing parameters  
SI 32768  
SF 600.2600185 MHz  
WM EM  
SSB 0  
LB 0.30 Hz  
GB 0  
PC 1.00

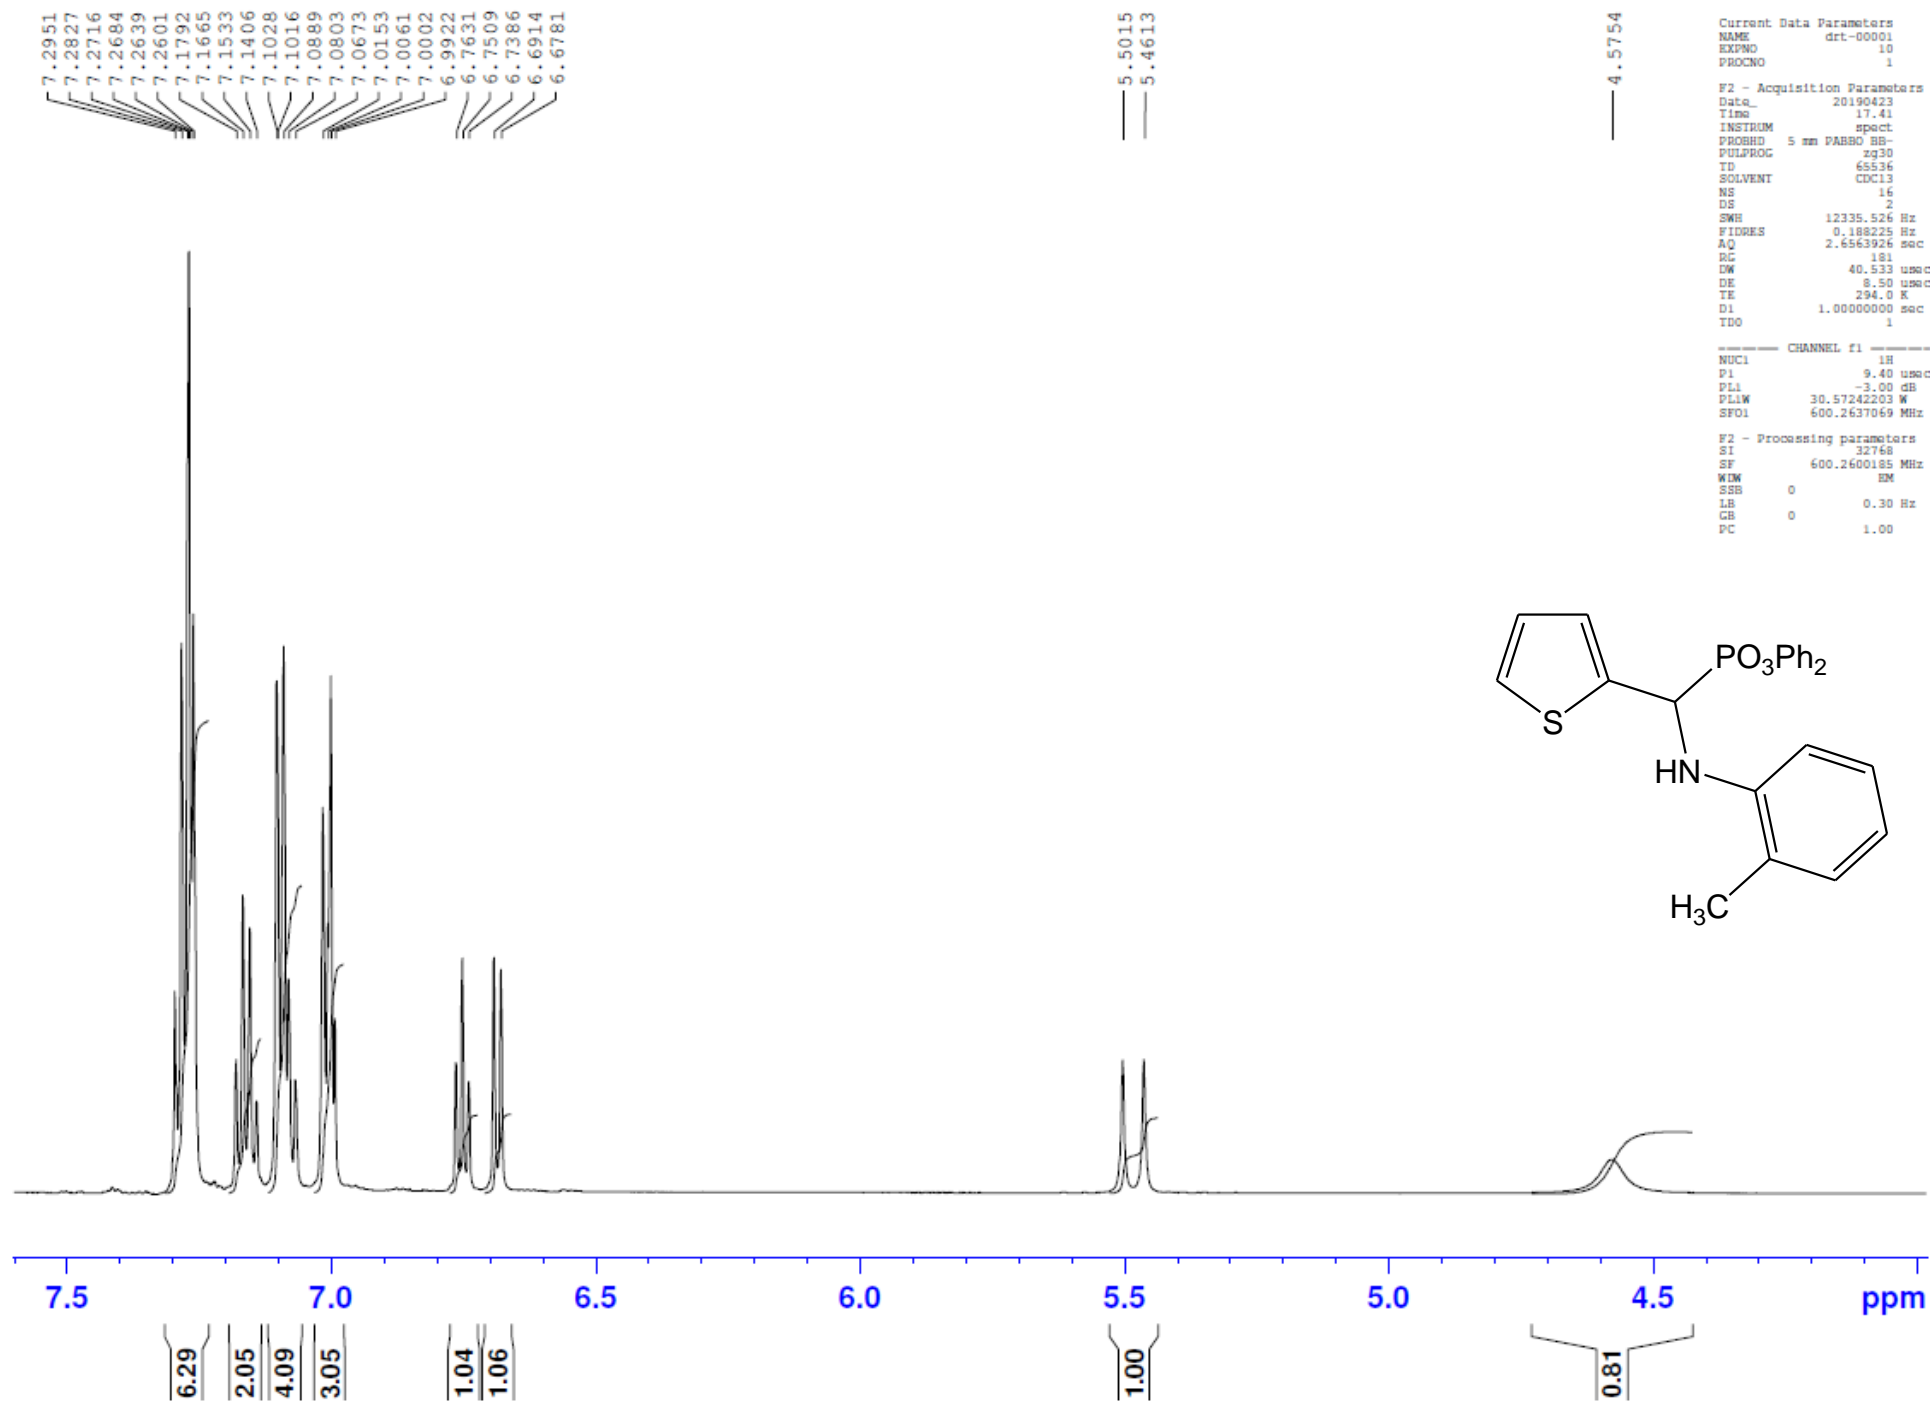

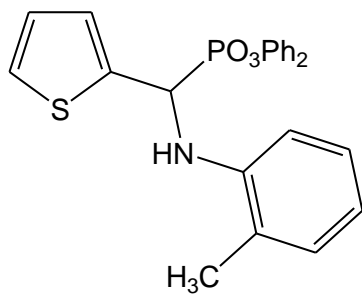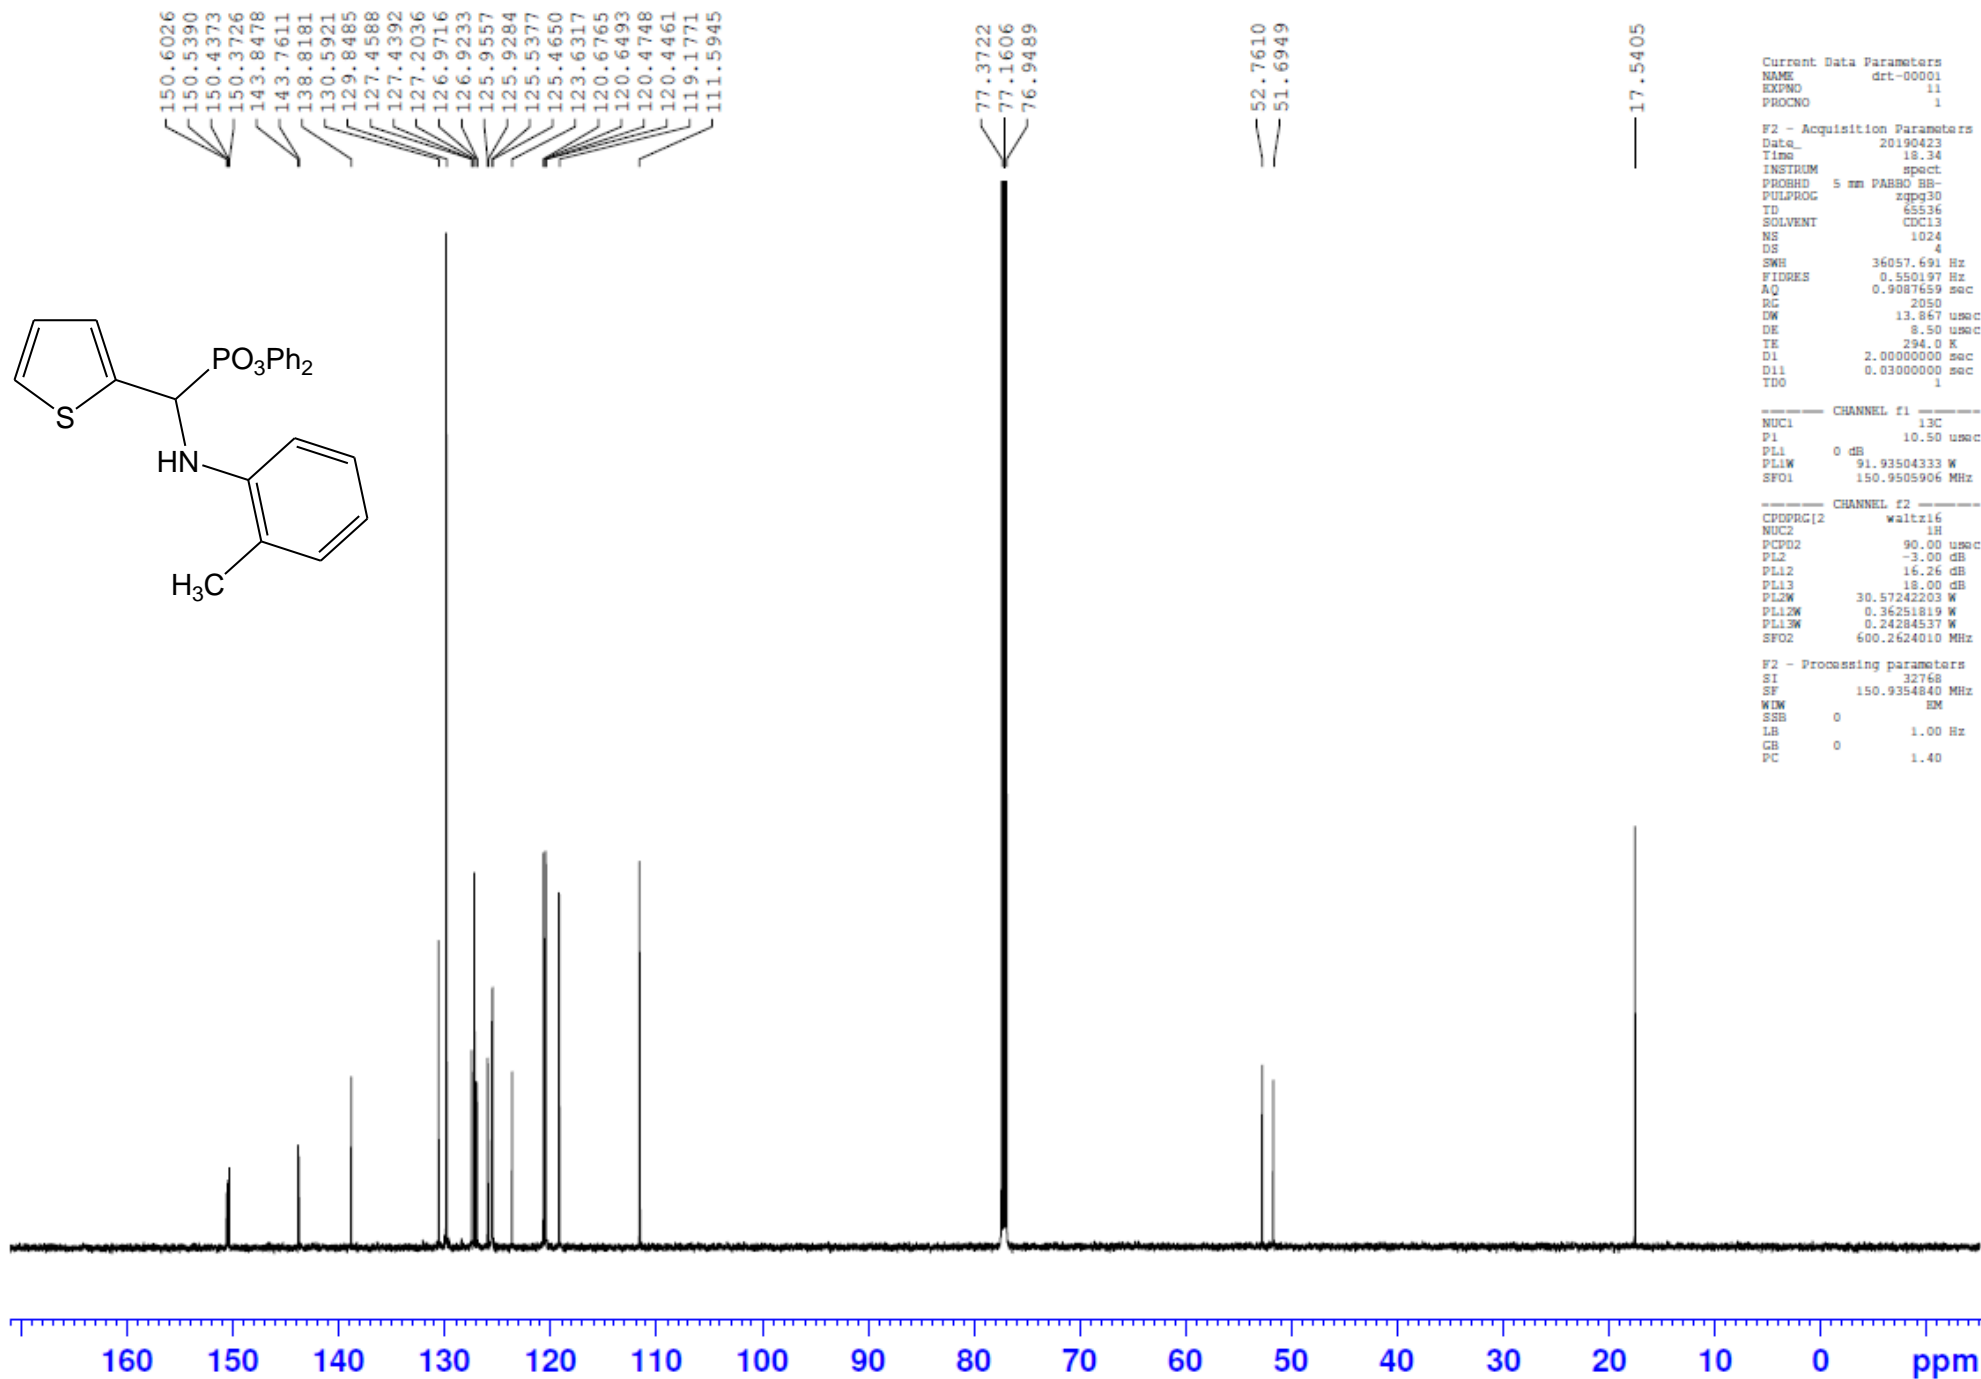

Current Data Parameters  
NAME drt-00001  
EXPNO 11  
PROCNO 1

F2 - Acquisition Parameters  
Date\_ 20190423  
Time 18.34  
INSTRUM spect  
PROBHD 5 mm PABBO BB-  
PULPROG zgpg30  
TD 65536  
SOLVENT CDCl<sub>3</sub>  
NS 1024  
DS 4  
SWH 36057.691 Hz  
FIDRES 0.550197 Hz  
AQ 0.9087659 sec  
RG 2050  
DW 13.867 usec  
DE 8.50 usec  
TE 294.0 K  
D1 2.00000000 sec  
D11 0.03000000 sec  
TD0 1

----- CHANNEL f1 -----  
NUC1 13C  
P1 10.50 usec  
PL1 0 dB  
PL1W 91.93504333 W  
SFO1 150.9505906 MHz

----- CHANNEL f2 -----  
CPDPRG2 waltz16  
NUC2 1H  
PCPD2 90.00 usec  
PL2 -3.00 dB  
PL12 16.26 dB  
PL13 18.00 dB  
PL12W 30.57242203 W  
PL12W 0.36251819 W  
PL13W 0.24284537 W  
SFO2 600.2624010 MHz

F2 - Processing parameters  
SI 32768  
SF 150.9354840 MHz  
WUM EM  
SSB 0  
LB 1.00 Hz  
GB 0  
PC 1.40

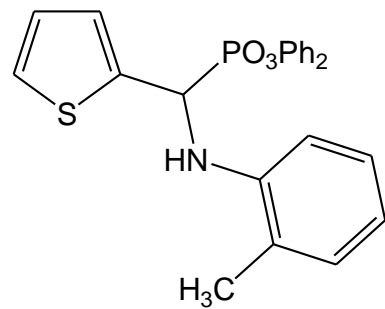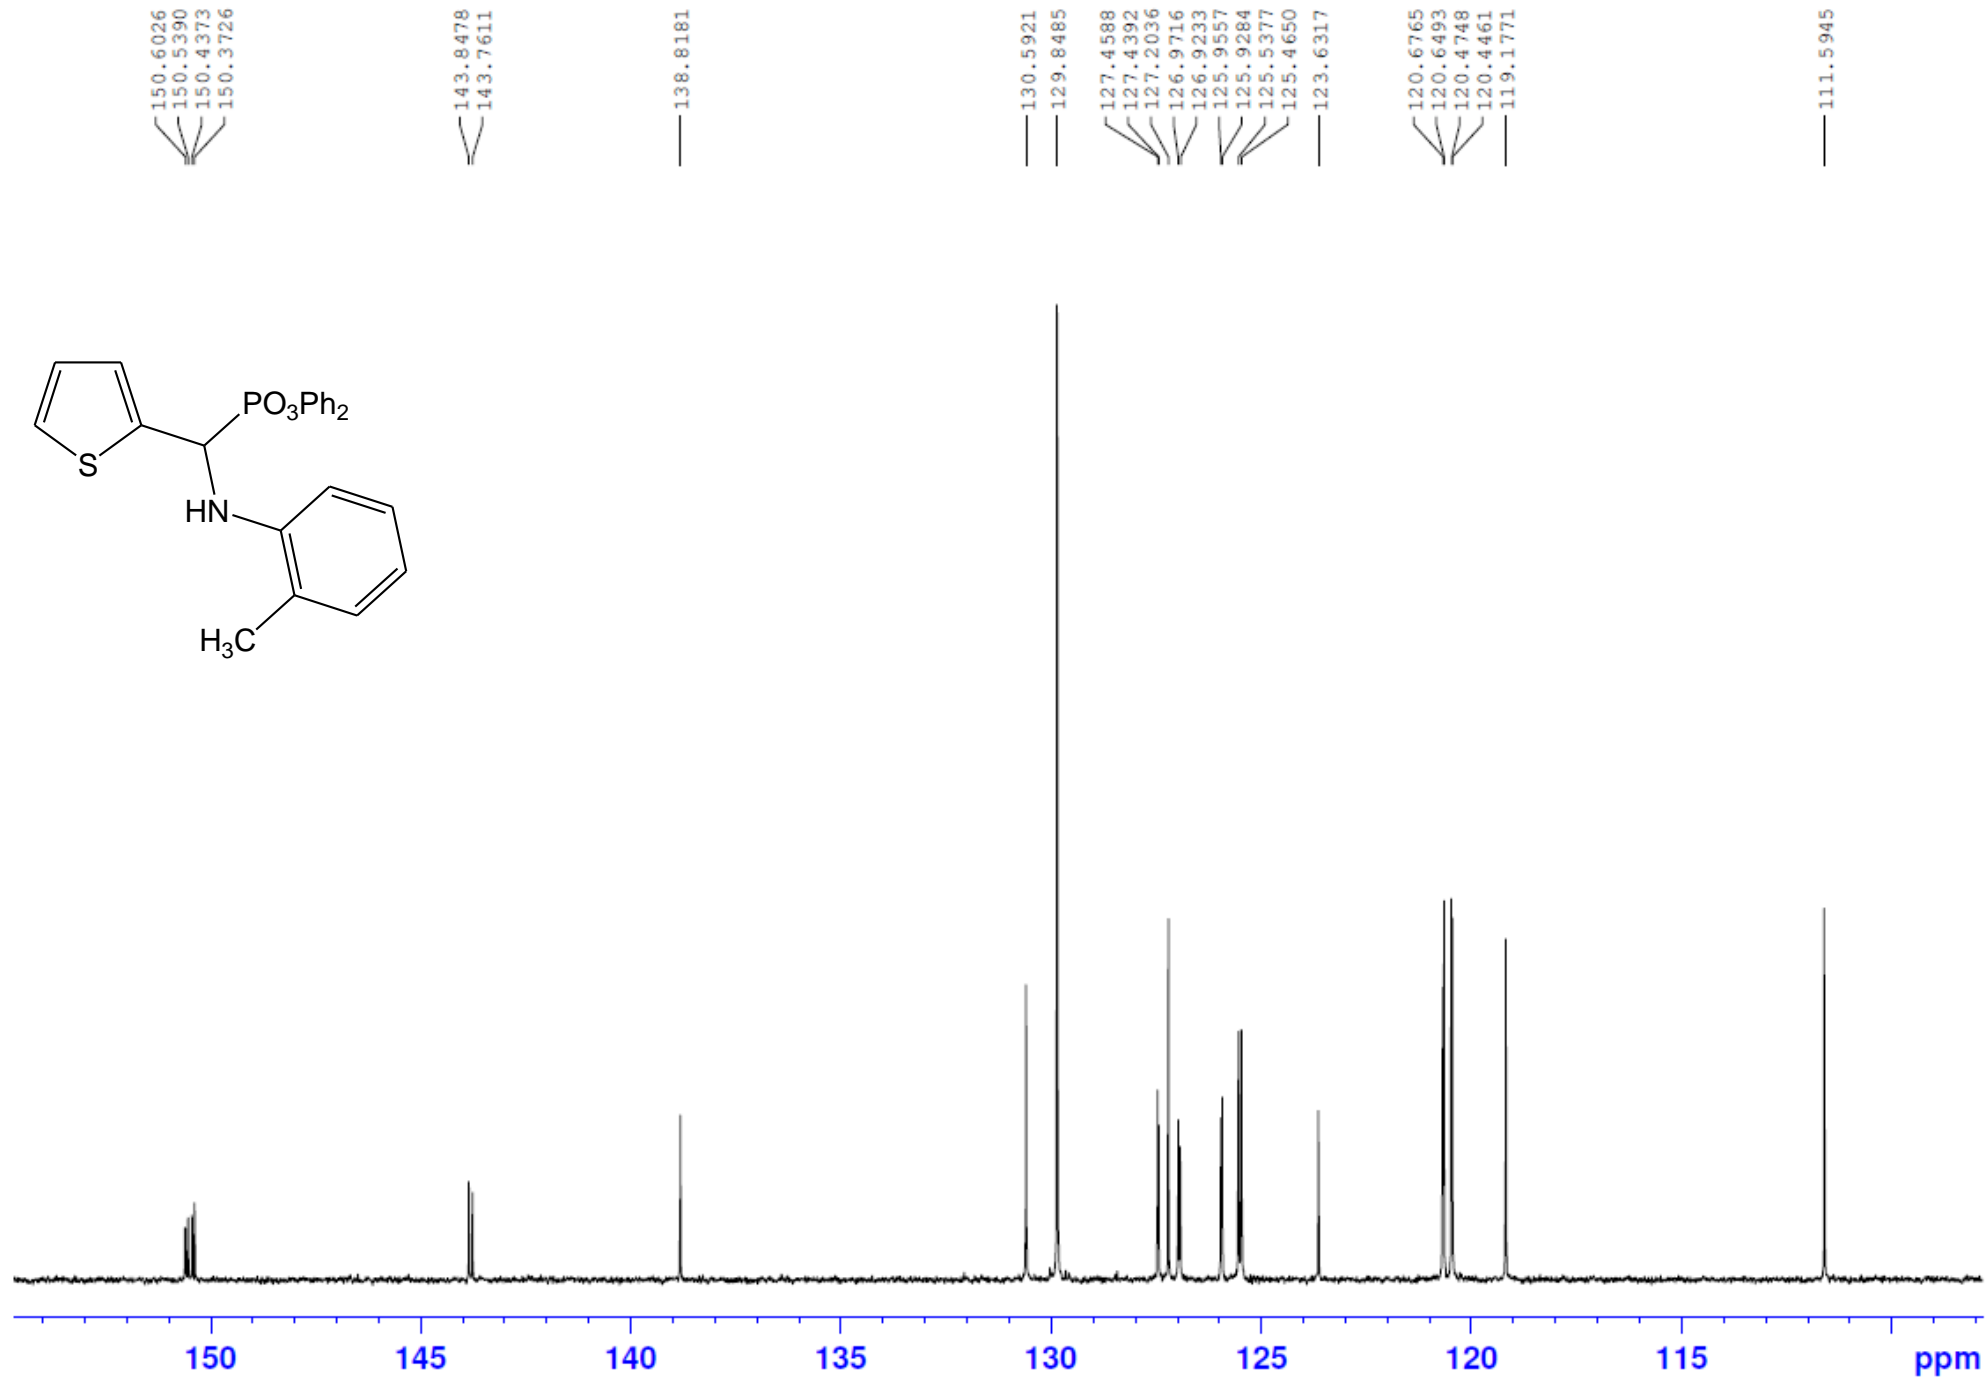

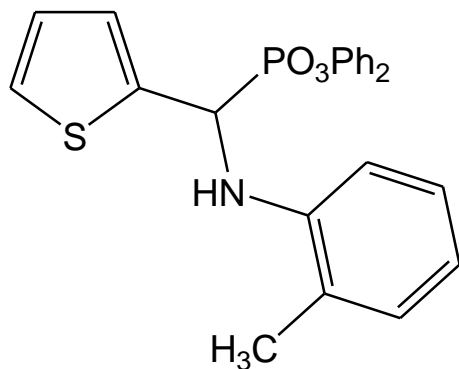

—13.3332

```

Current Data Parameters
NAME      drt-00001
EXPNO     12
PROCNO    1

F2 - Acquisition Parameters
Date_     20190423
Time      18.40
INSTRUM   spect
PROBHD    5 mm PABBO BB-
PULPROG   zgpg30
TD        65536
SOLVENT   CDCl3
NS         128
DS         4
SWH        96153.844 Hz
FIDRES     1.467191 Hz
AQ         0.3497872 sec
RG         2050
DW         5.200 usec
DE         8.50 usec
TE         294.0 K
D1         2.00000000 sec
D11        0.03000000 sec
TD0        1

===== CHANNEL f1 =====
NUC1       31P
P1         13.70 usec
PL1        0.40 dB
PL1W       69.18420410 W
SFO1       242.9775524 MHz

===== CHANNEL f2 =====
CPDPRG2    waltz16
NUC2       1H
PCPD2      90.00 usec
PL2        -3.00 dB
PL12       16.26 dB
PL13       18.00 dB
PL2W       30.57242203 W
PL12W      0.36251819 W
PL13W      0.24284537 W
SFO2       600.2624010 MHz

F2 - Processing parameters
SI         32768
SF         242.9897020 MHz
WDW        EM
SSB        0
GB         0
PC         1.40
  
```

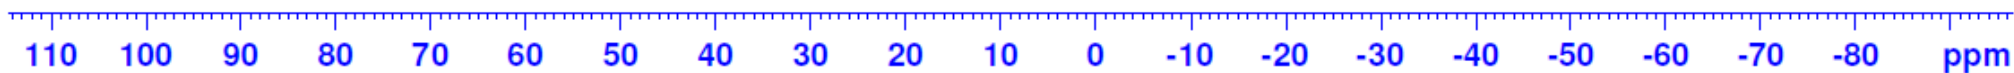

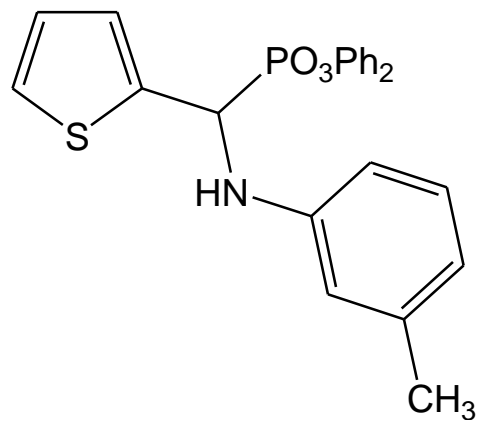

Fig. S2.  $^1\text{H}$  NMR,  $^{13}\text{C}$  NMR,  $^{31}\text{P}$  NMR spectra of diphenyl N-(3-methylphenyl)amino(2-thienyl)methylphosphonate (**2**)



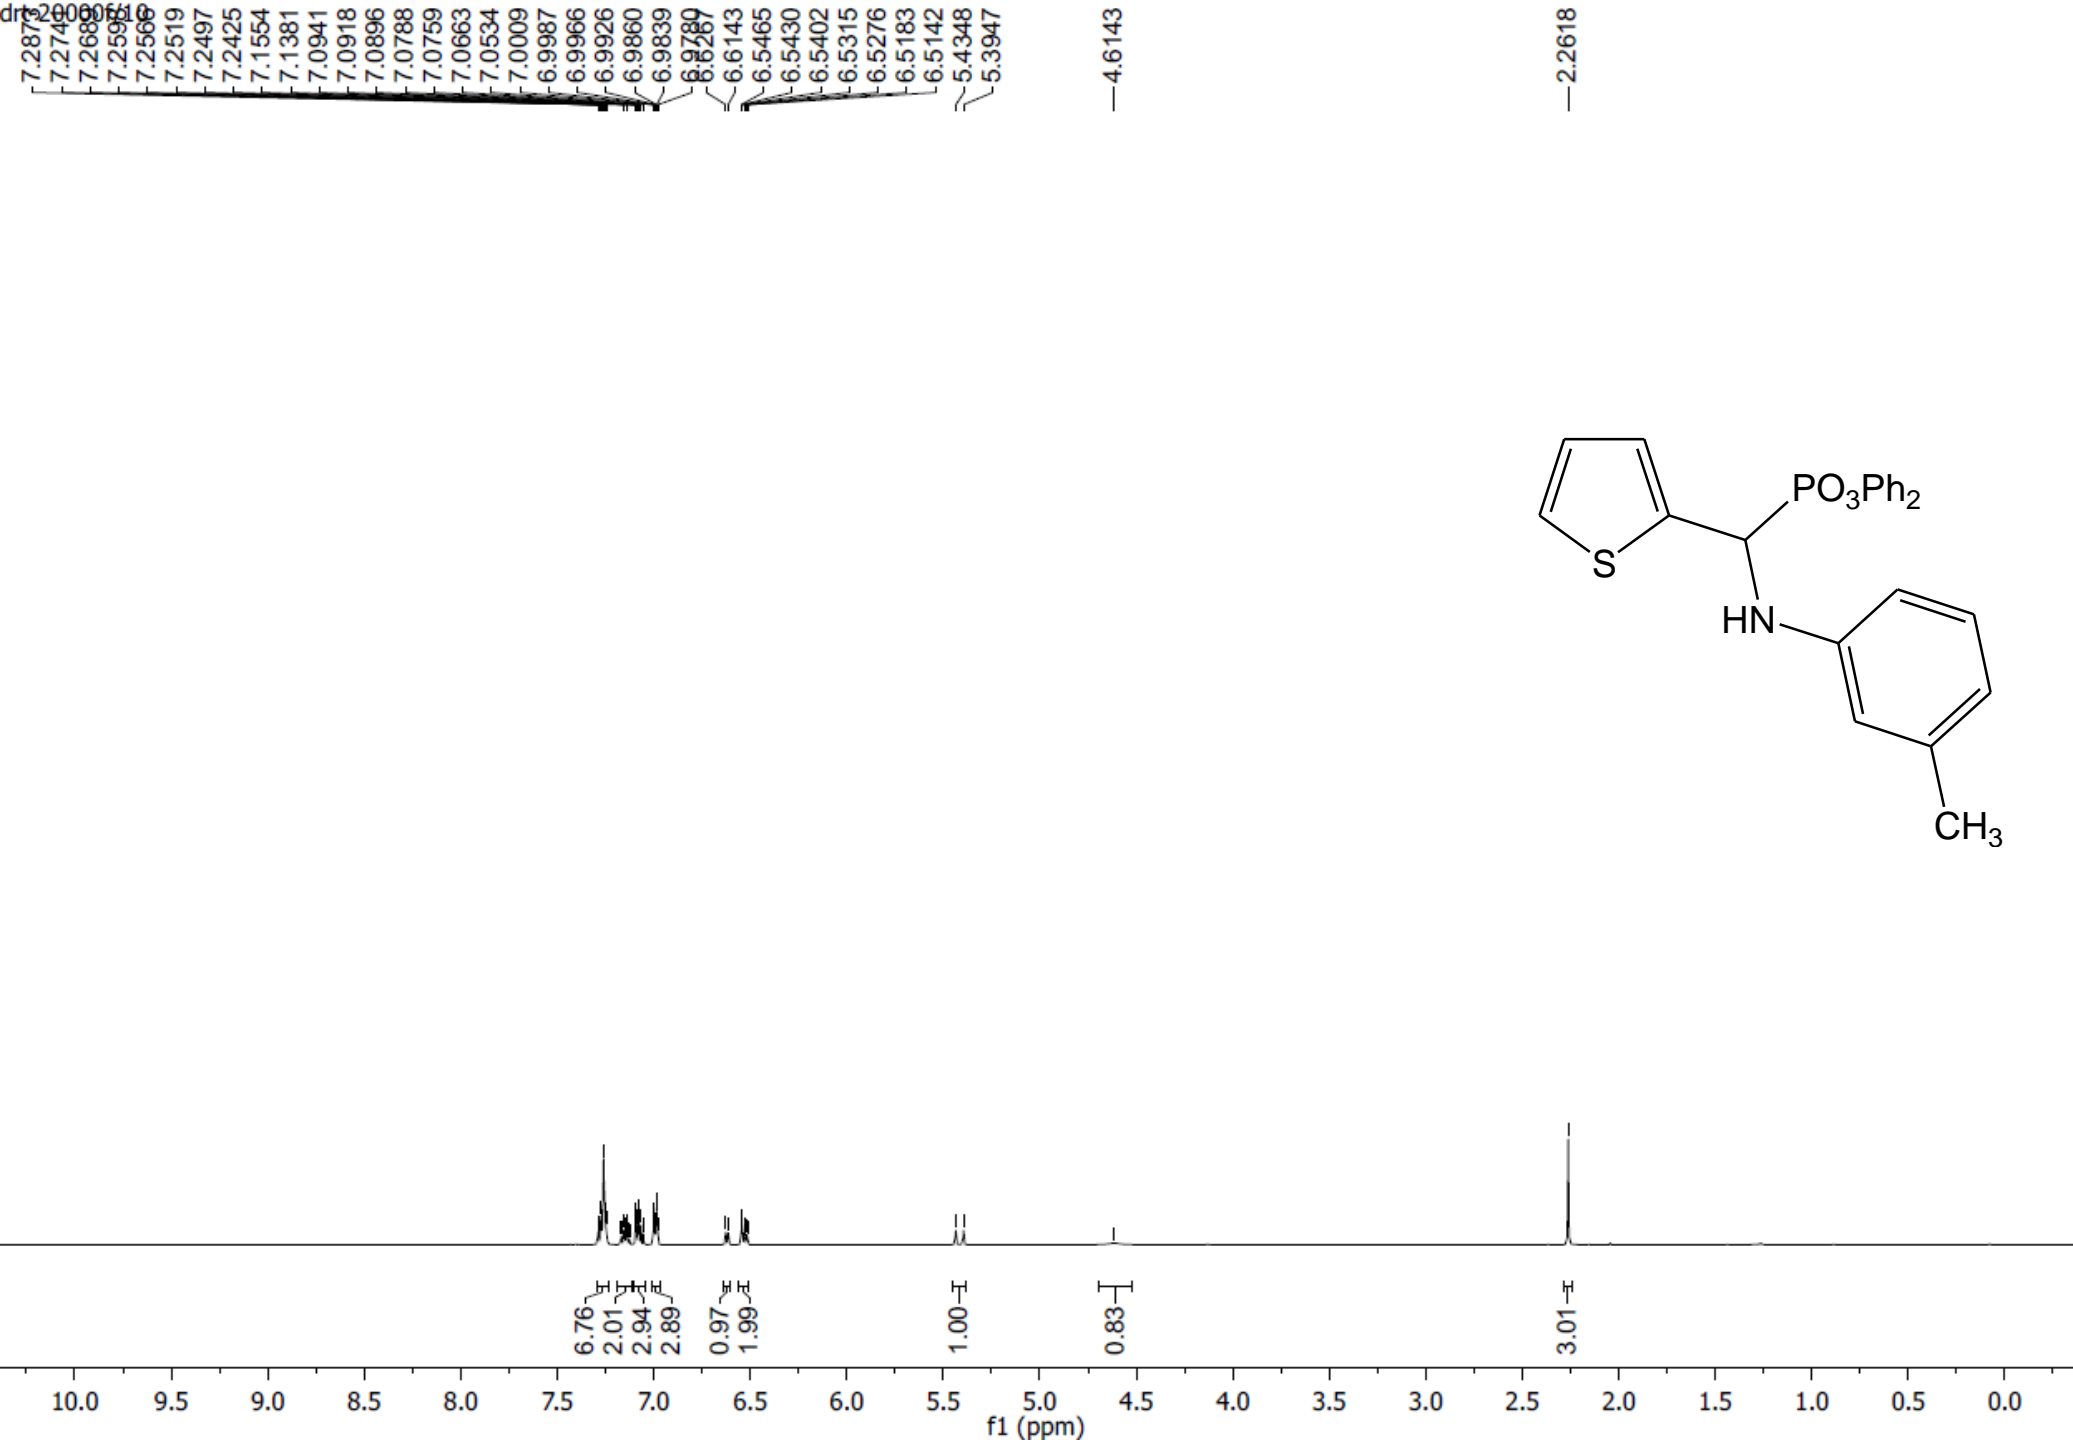

—13.3279

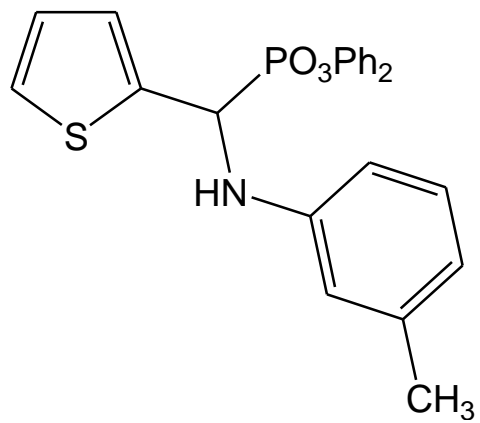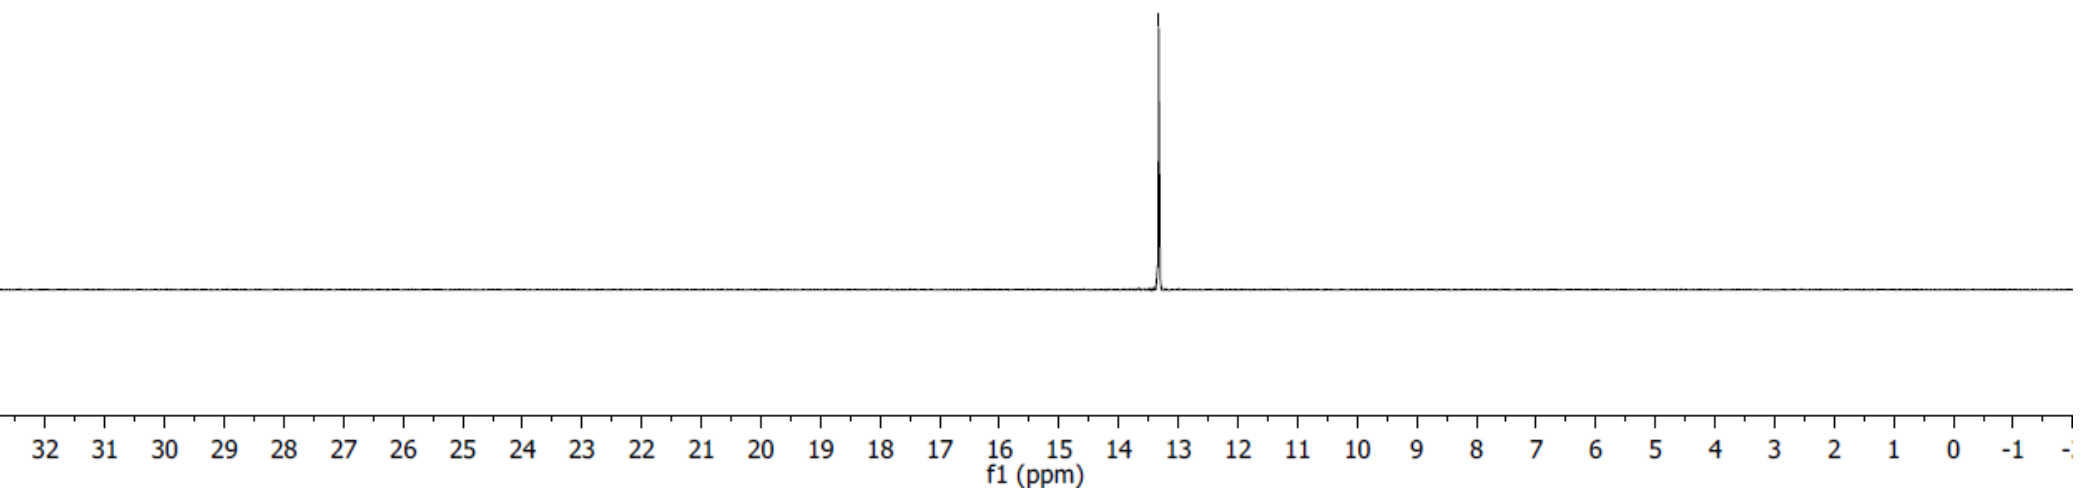

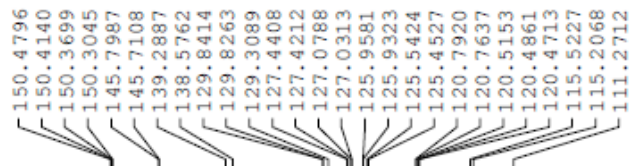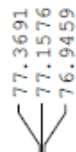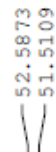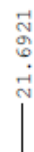

```
F2 - Processing parameters
SI                      32768
SF                      150.9354866 MHz
WIDW                     EM
SSB                      0
LB                      1.00 Hz
GB                      0
PC                      1.40
```

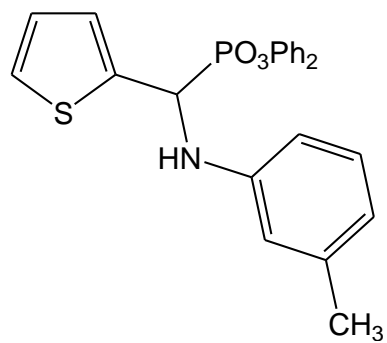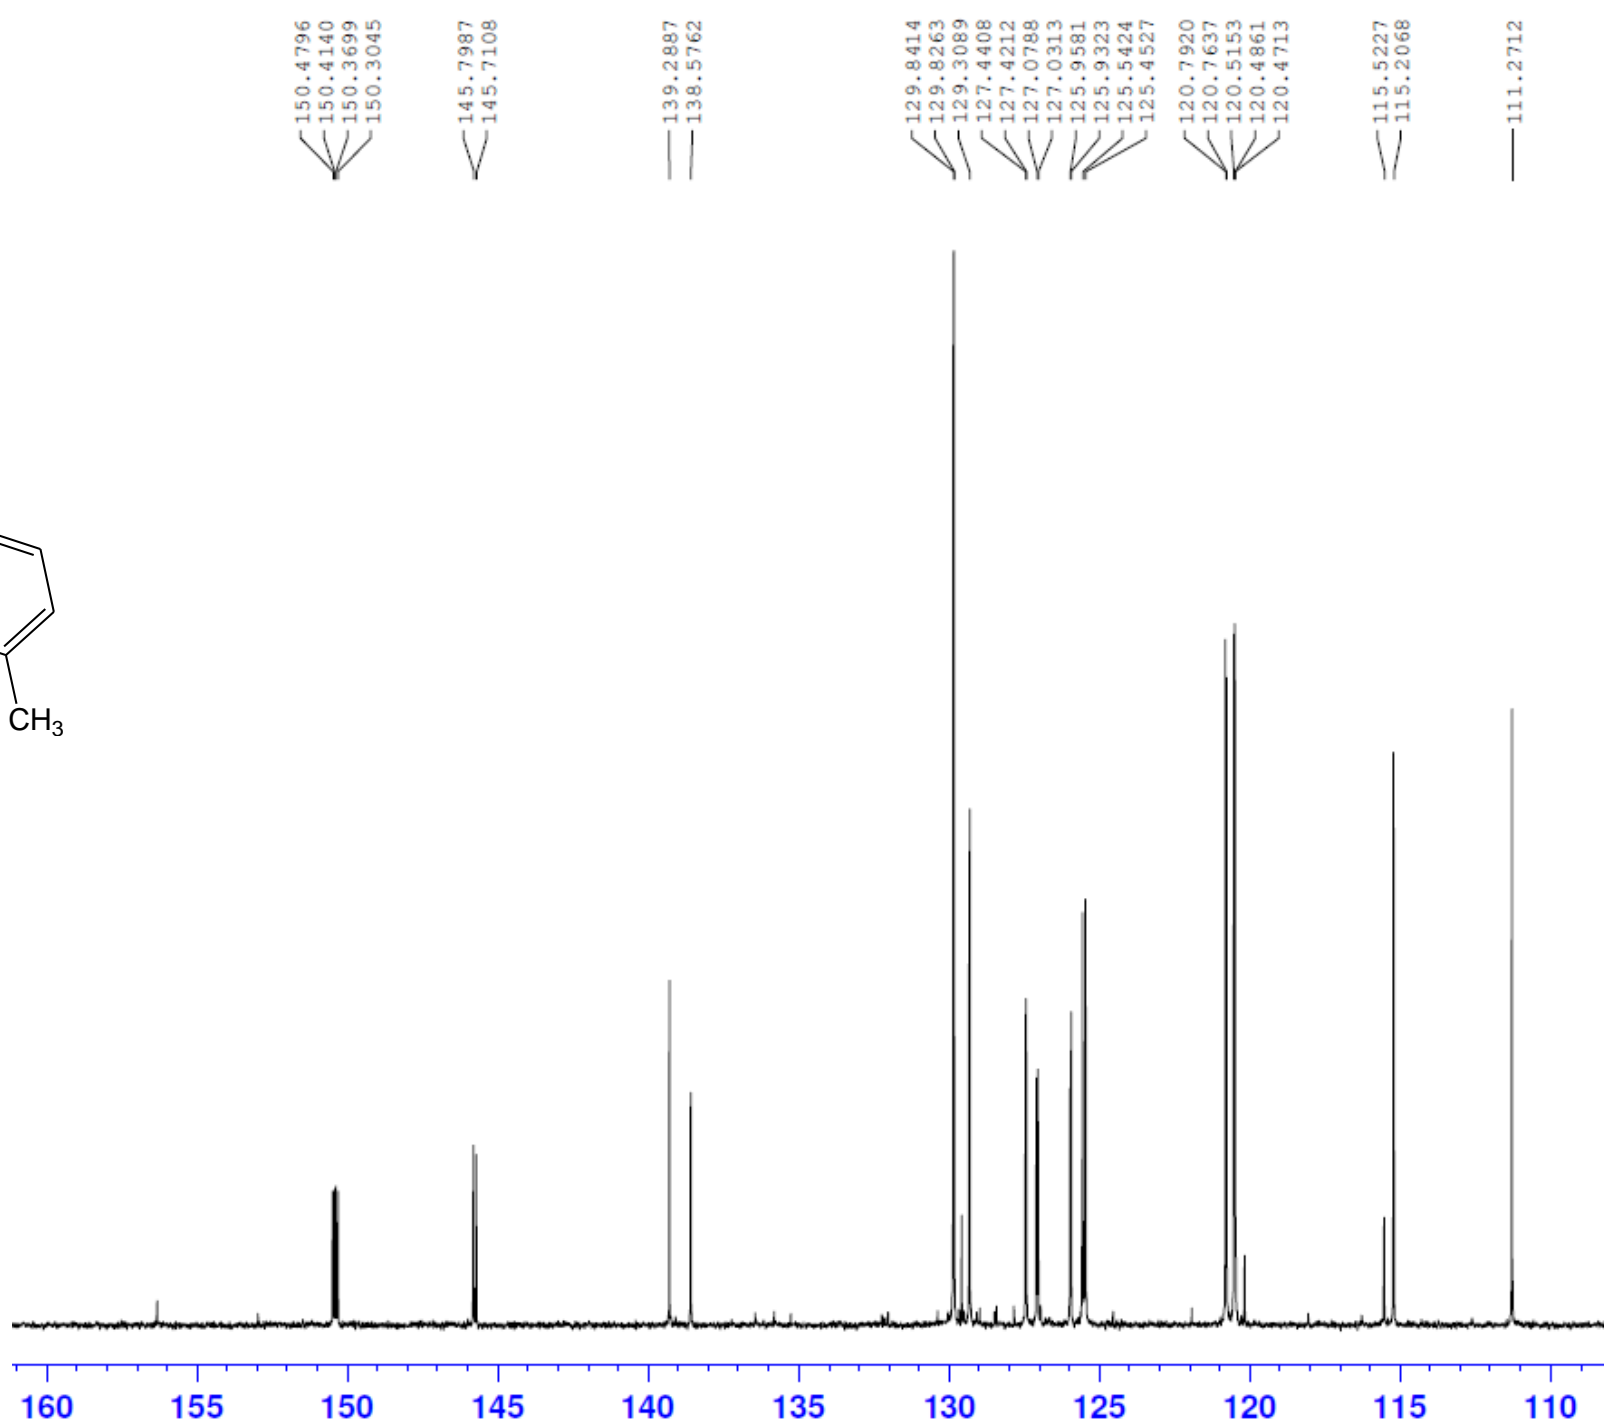

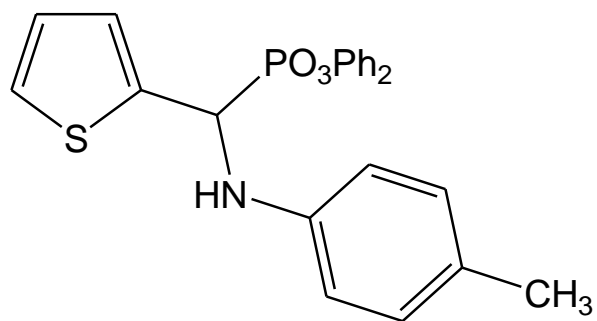

Fig. S3.  $^1\text{H}$  NMR,  $^{13}\text{C}$  NMR,  $^{31}\text{P}$  NMR spectra of diphenyl N-(4-methylphenyl)amino(2-thienyl)methylphosphonate (**3**)

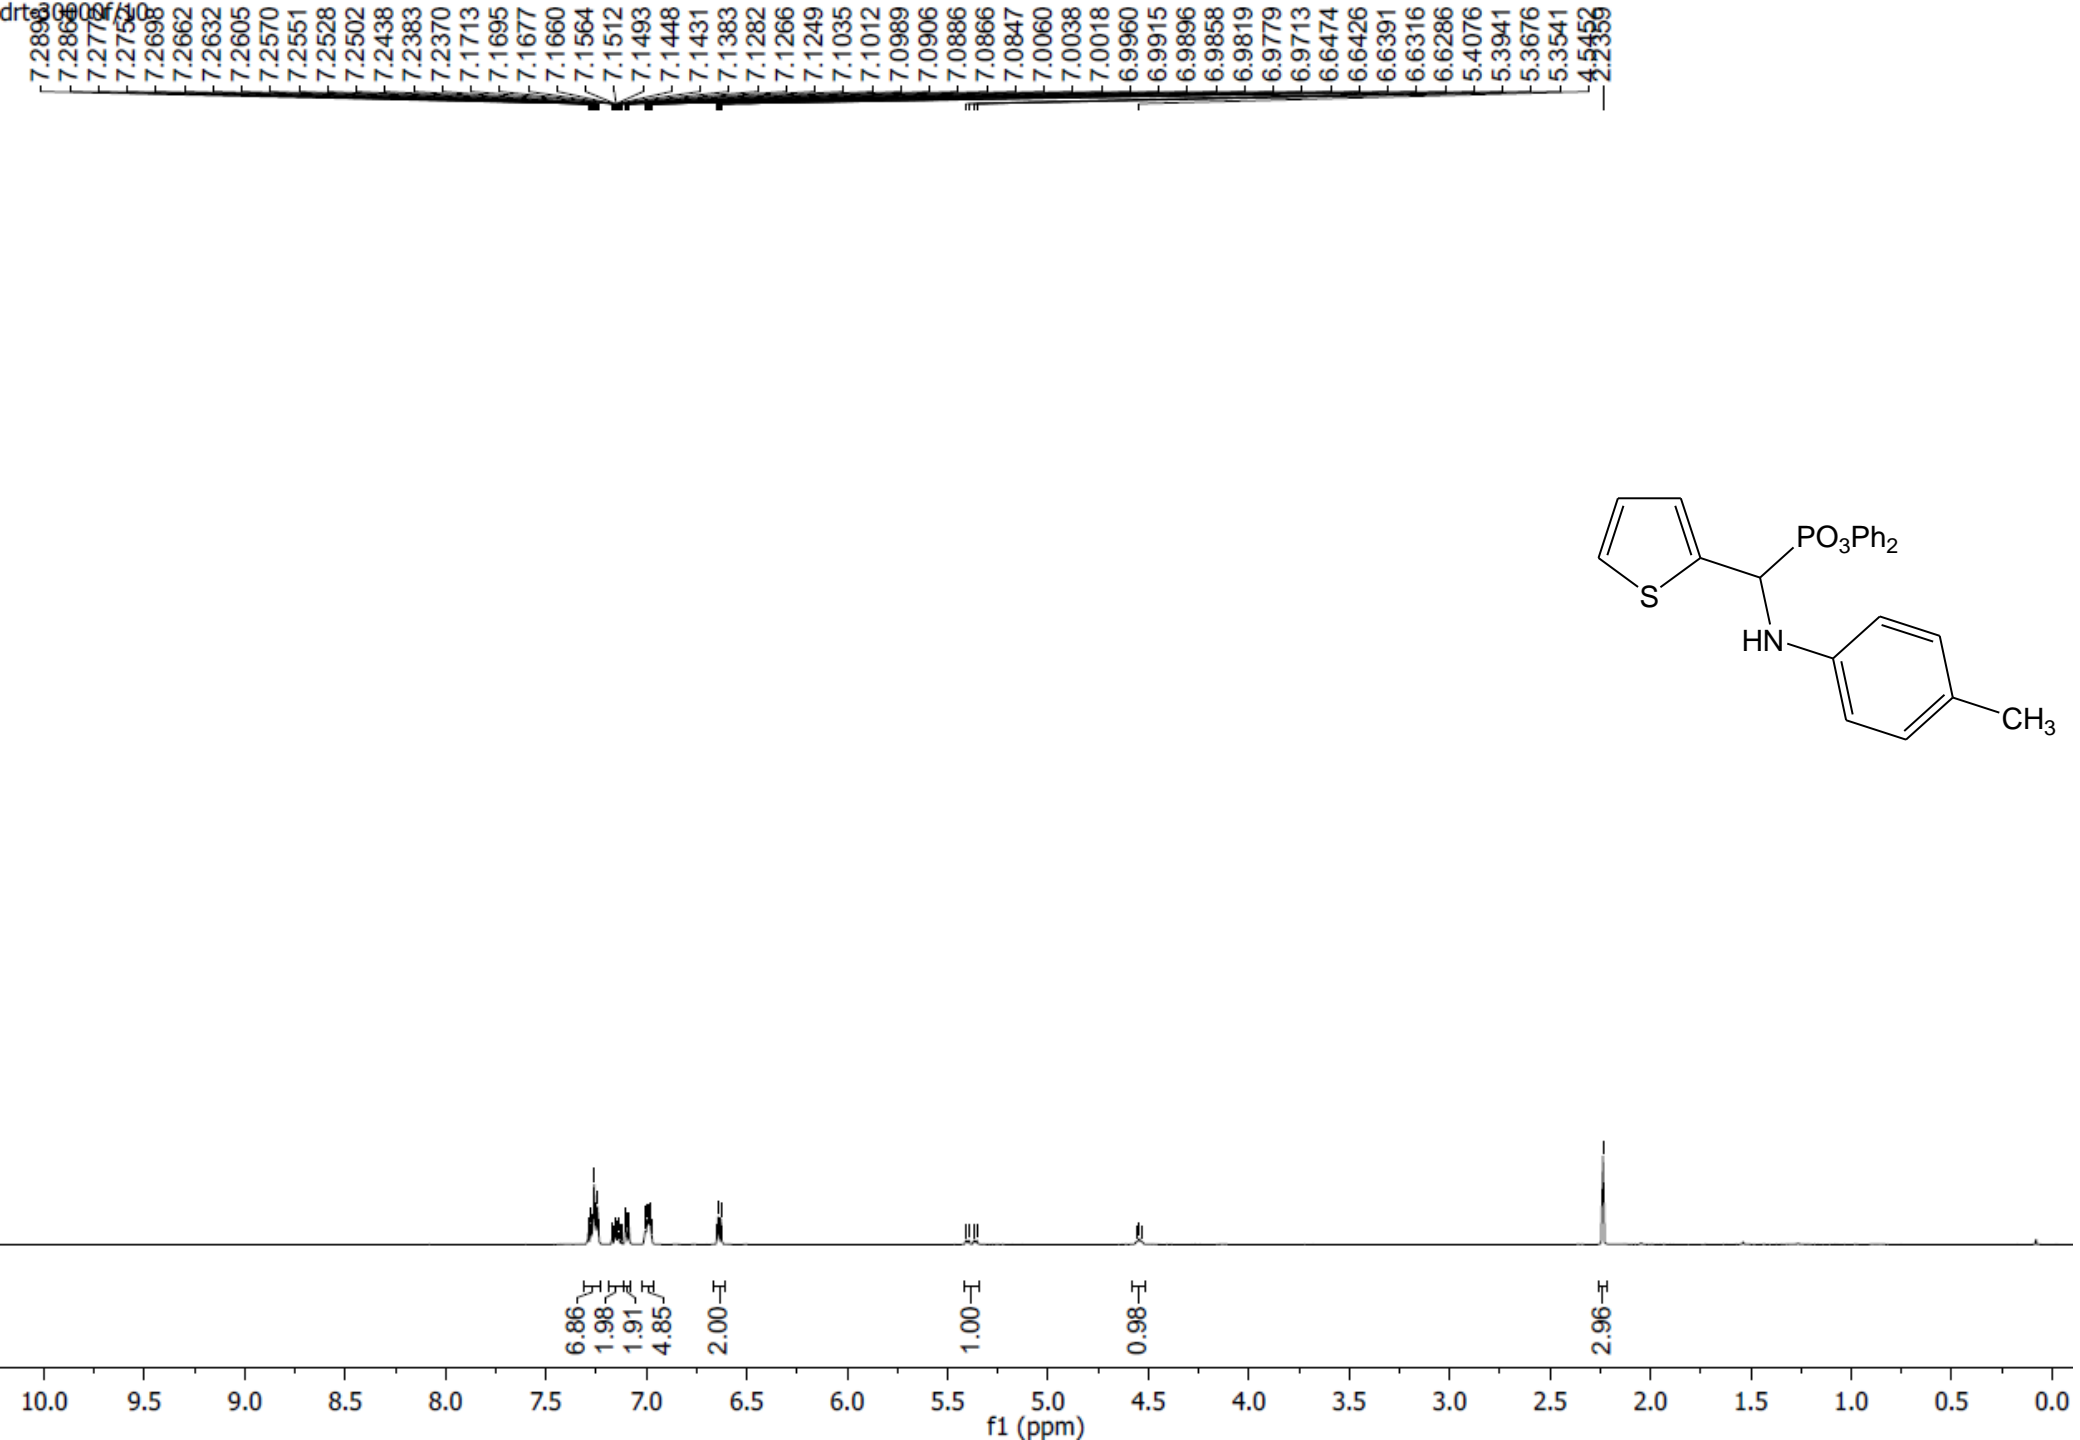

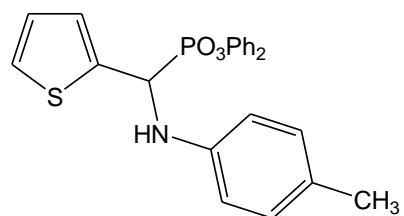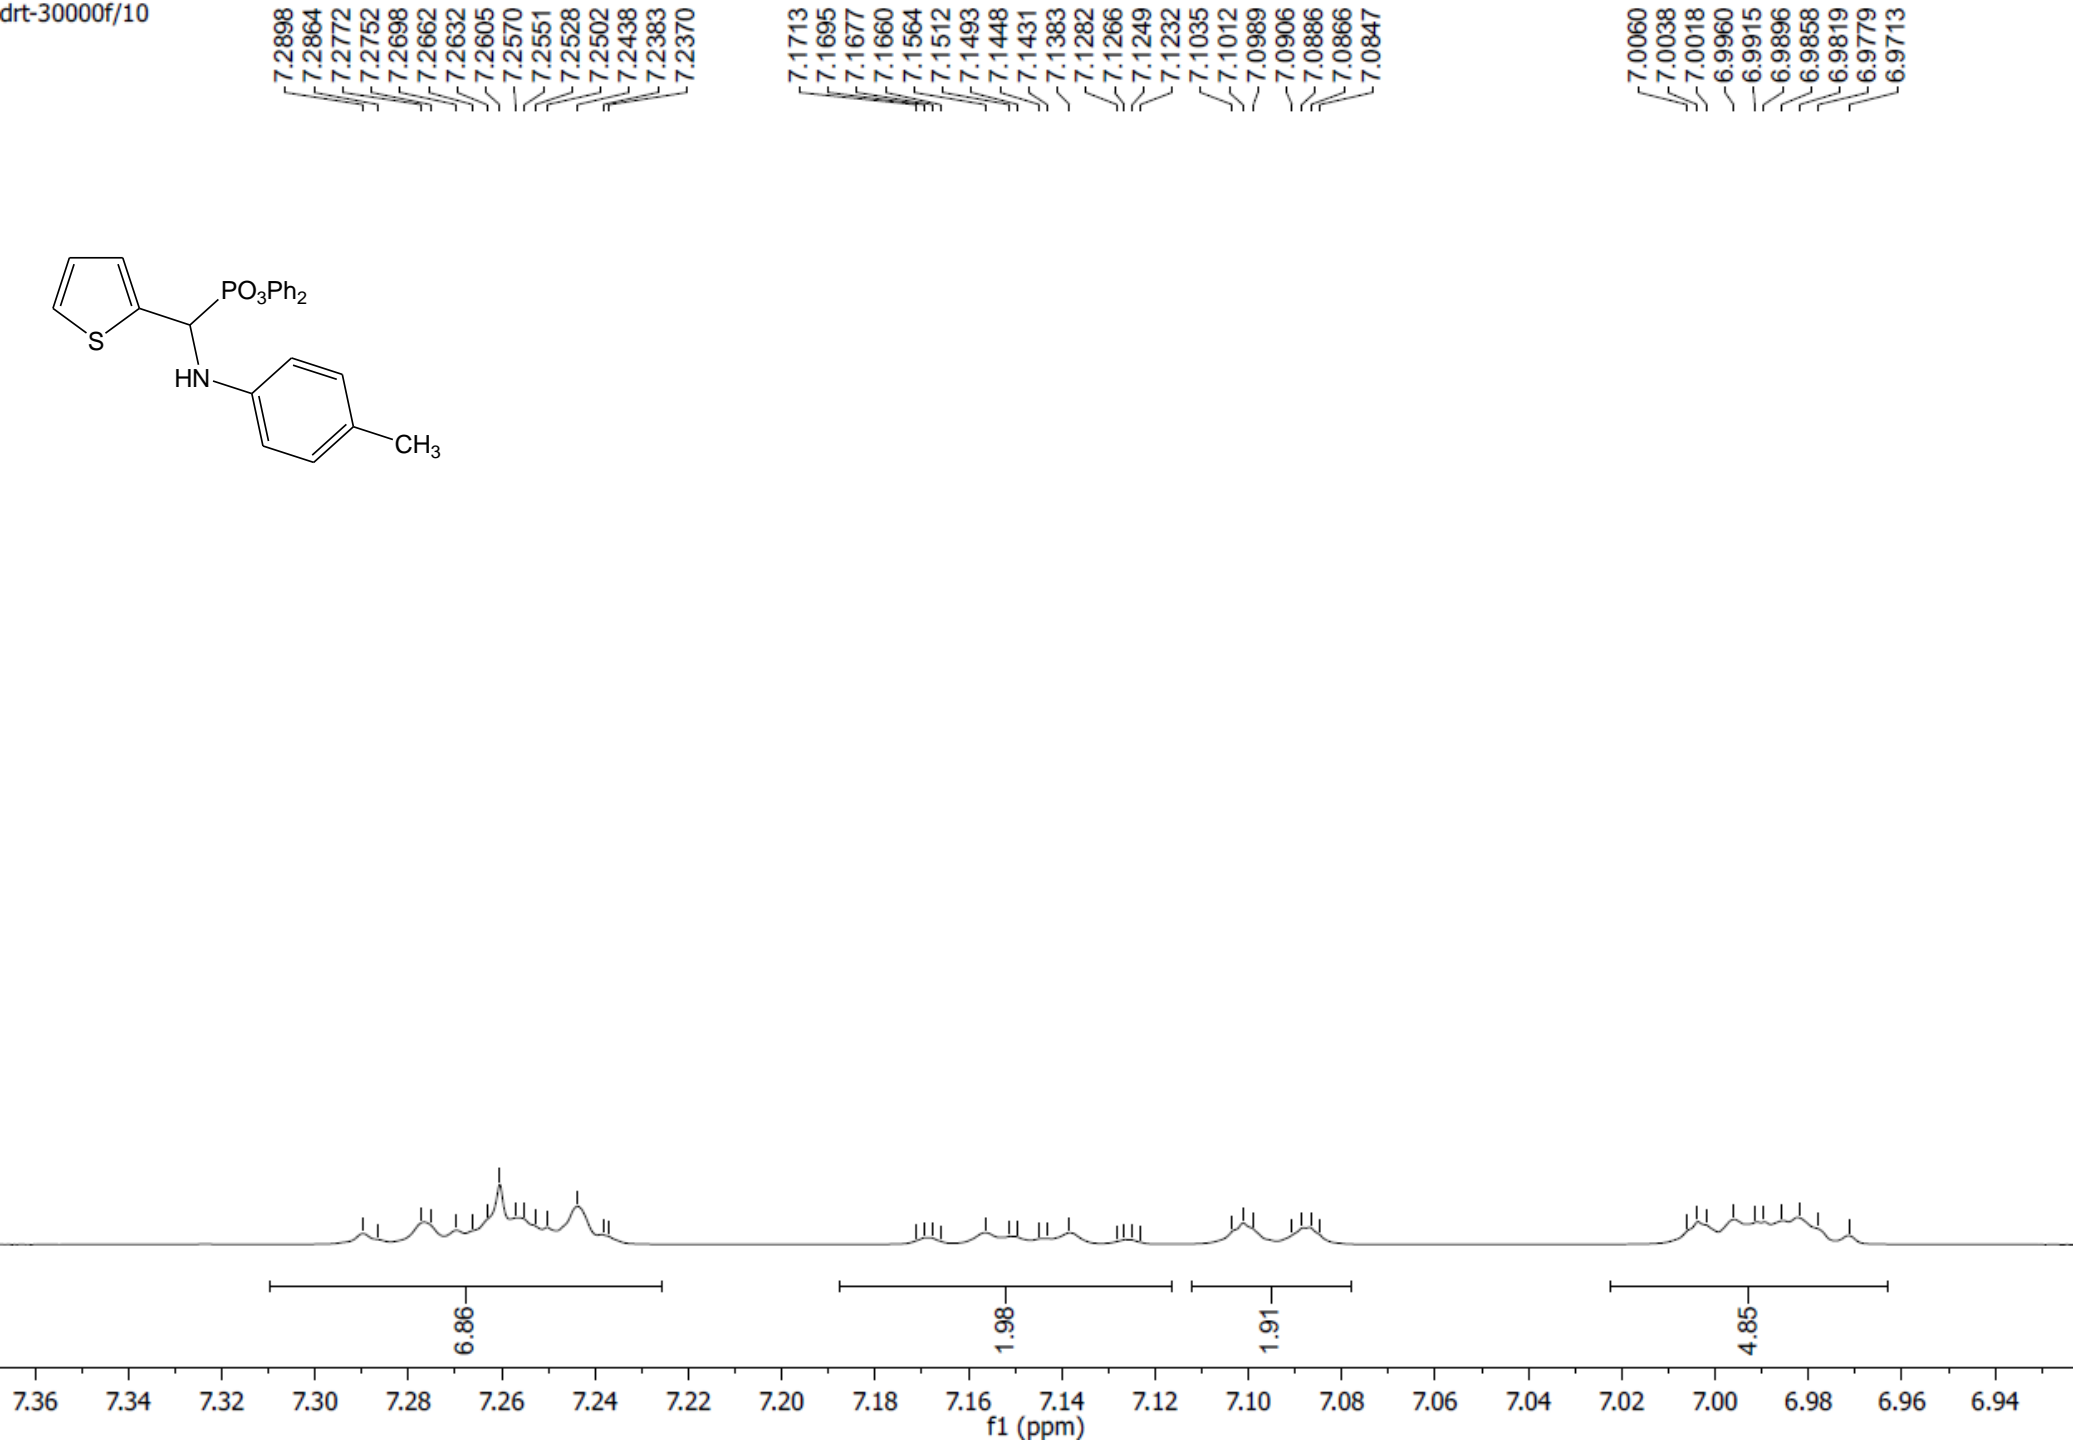

6.6474  
6.6426  
6.6391  
6.6316  
6.6286  
6.6236

5.4076  
5.3941  
5.3676  
5.3541

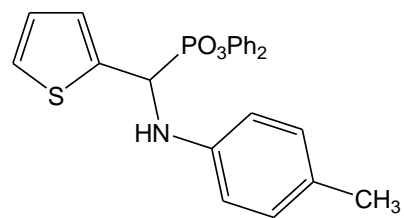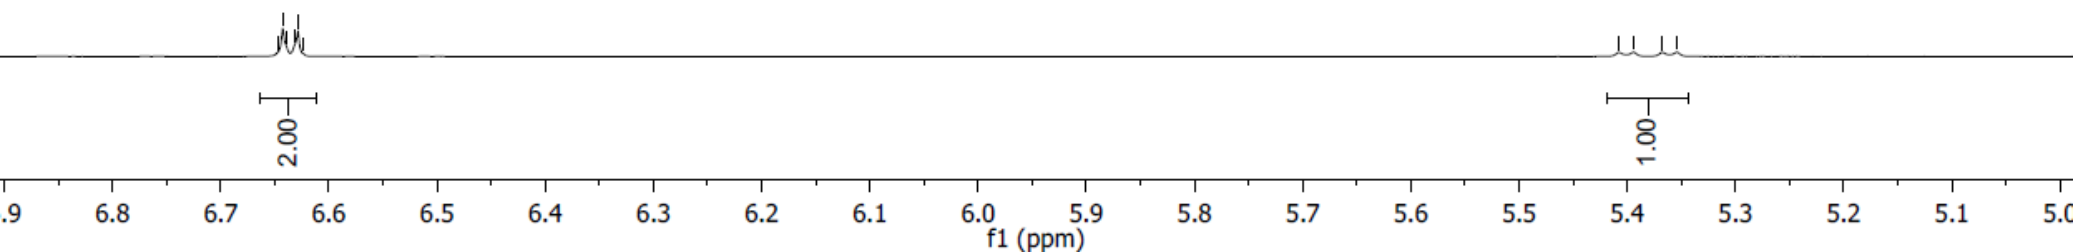



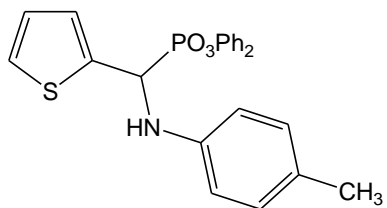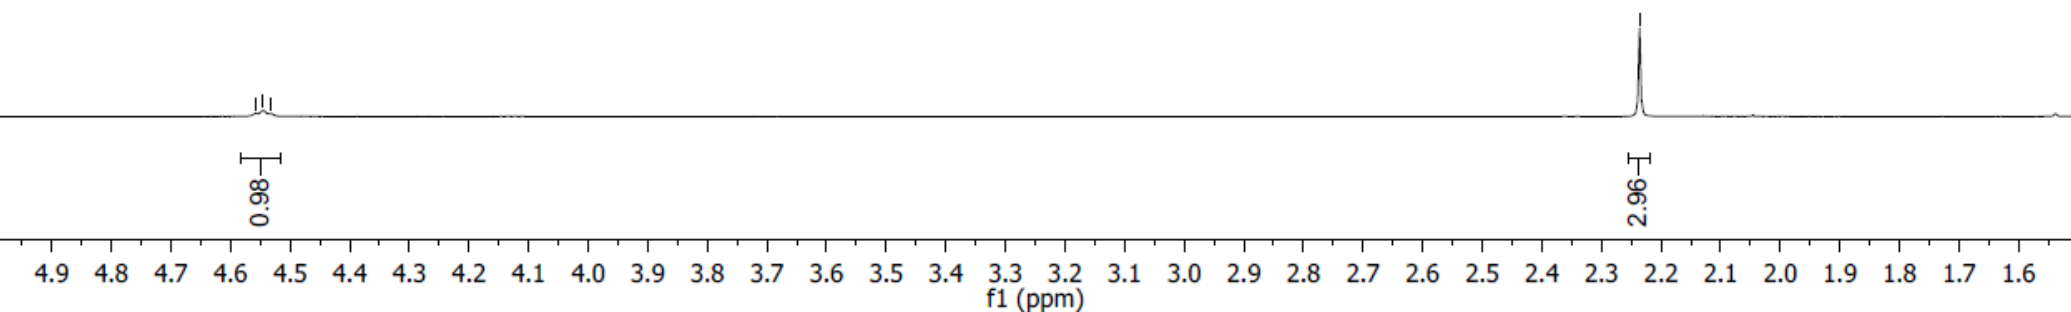

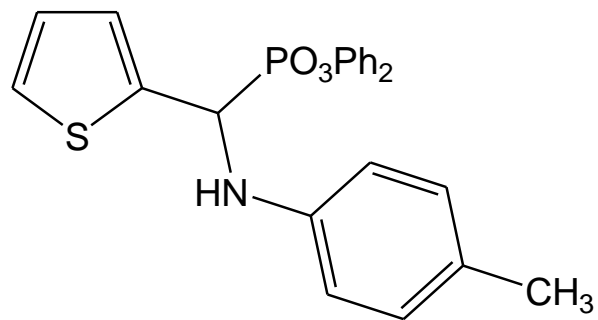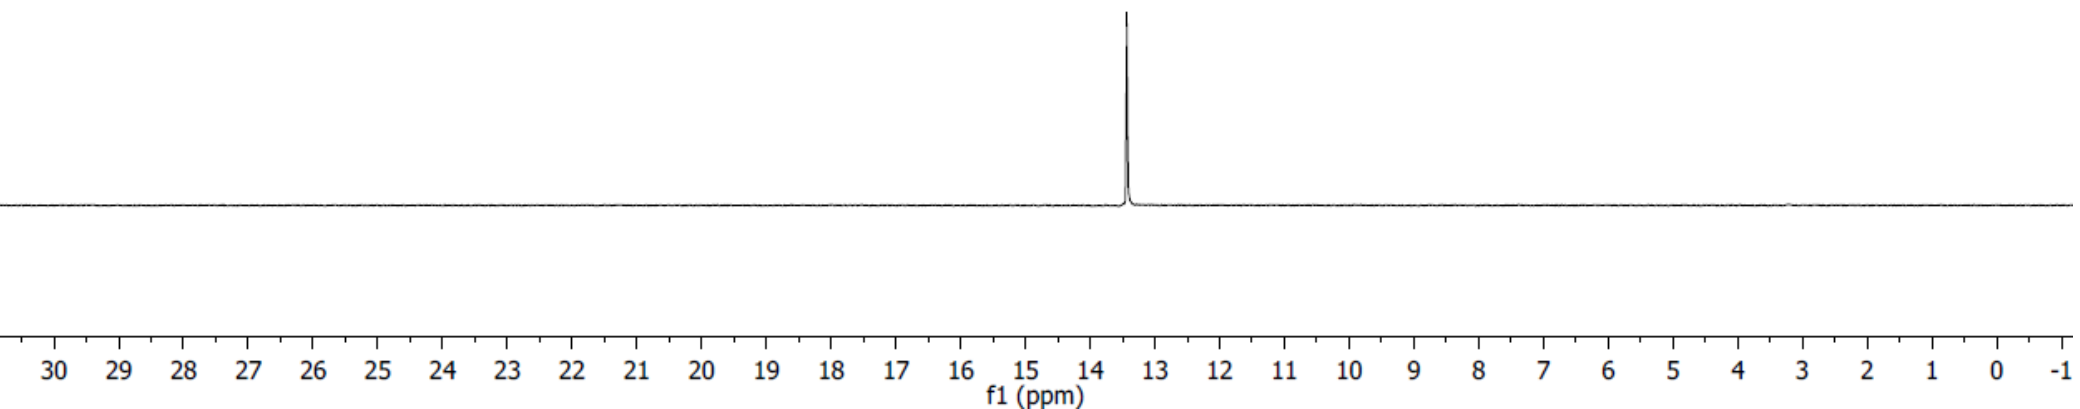

150.5322  
150.4667  
150.4018  
150.3369  
143.4708  
143.3786  
138.6923  
129.9667  
129.8483  
129.8276  
128.8402  
127.4141  
127.3964  
127.0719  
127.0216  
125.9548  
125.9278  
125.5370  
125.4374  
120.8157  
120.7874  
120.5341  
120.5078  
114.4959

77.3681  
77.1564  
76.9446

52.9566  
51.8801

20.5720

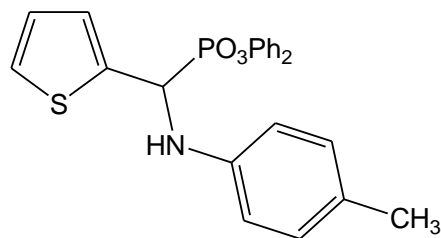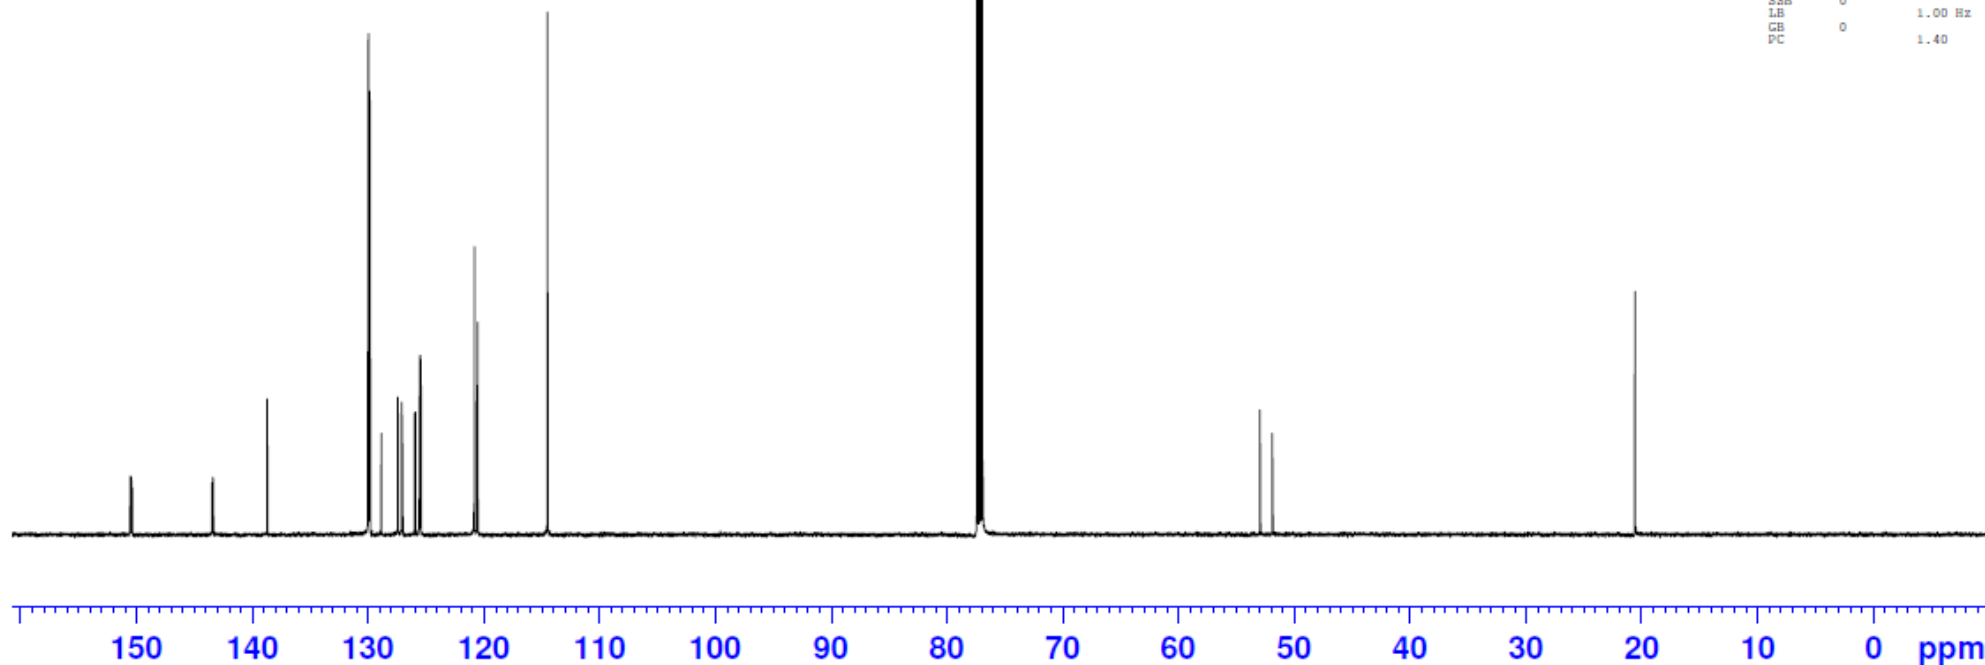

Current Data Parameters  
NAME drt-00003  
EXPNO 10  
PROCNO 1

F2 - Acquisition Parameters  
Date\_ 20190425  
Time 22.27  
INSTRUM spect  
PROBHD 5 mm PABBO BB-  
PULPROG zgpg30  
TD 65536  
SOLVENT CDCl3  
NS 2048  
DS 4  
SWH 36057.691 Hz  
FIDRES 0.550197 Hz  
AQ 0.9087659 sec  
RG 2050  
DW 13.867 usec  
DE 8.50 usec  
TE 294.0 K  
D1 2.00000000 sec  
D11 0.03000000 sec  
TD0 1

CHANNEL f1  
NUC1 13C  
P1 10.50 usec  
PL1 0 dB  
PL1W 91.93504333 W  
SFO1 150.9505906 MHz

CHANNEL f2  
CPDPRG2 waltz16  
NUC2 1H  
PCPD2 90.00 usec  
PL2 -3.00 dB  
PL12 16.26 dB  
PL13 18.00 dB  
PL2W 30.57242203 W  
PL12W 0.36251819 W  
PL13W 0.24284537 W  
SFO2 600.2624010 MHz

F2 - Processing parameters  
SI 32768  
SF 150.9354841 MHz  
WDW EM  
SSB 0  
LB 1.00 Hz  
GB 0  
PC 1.40

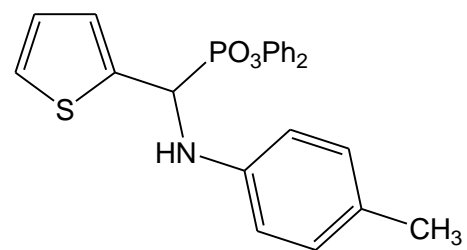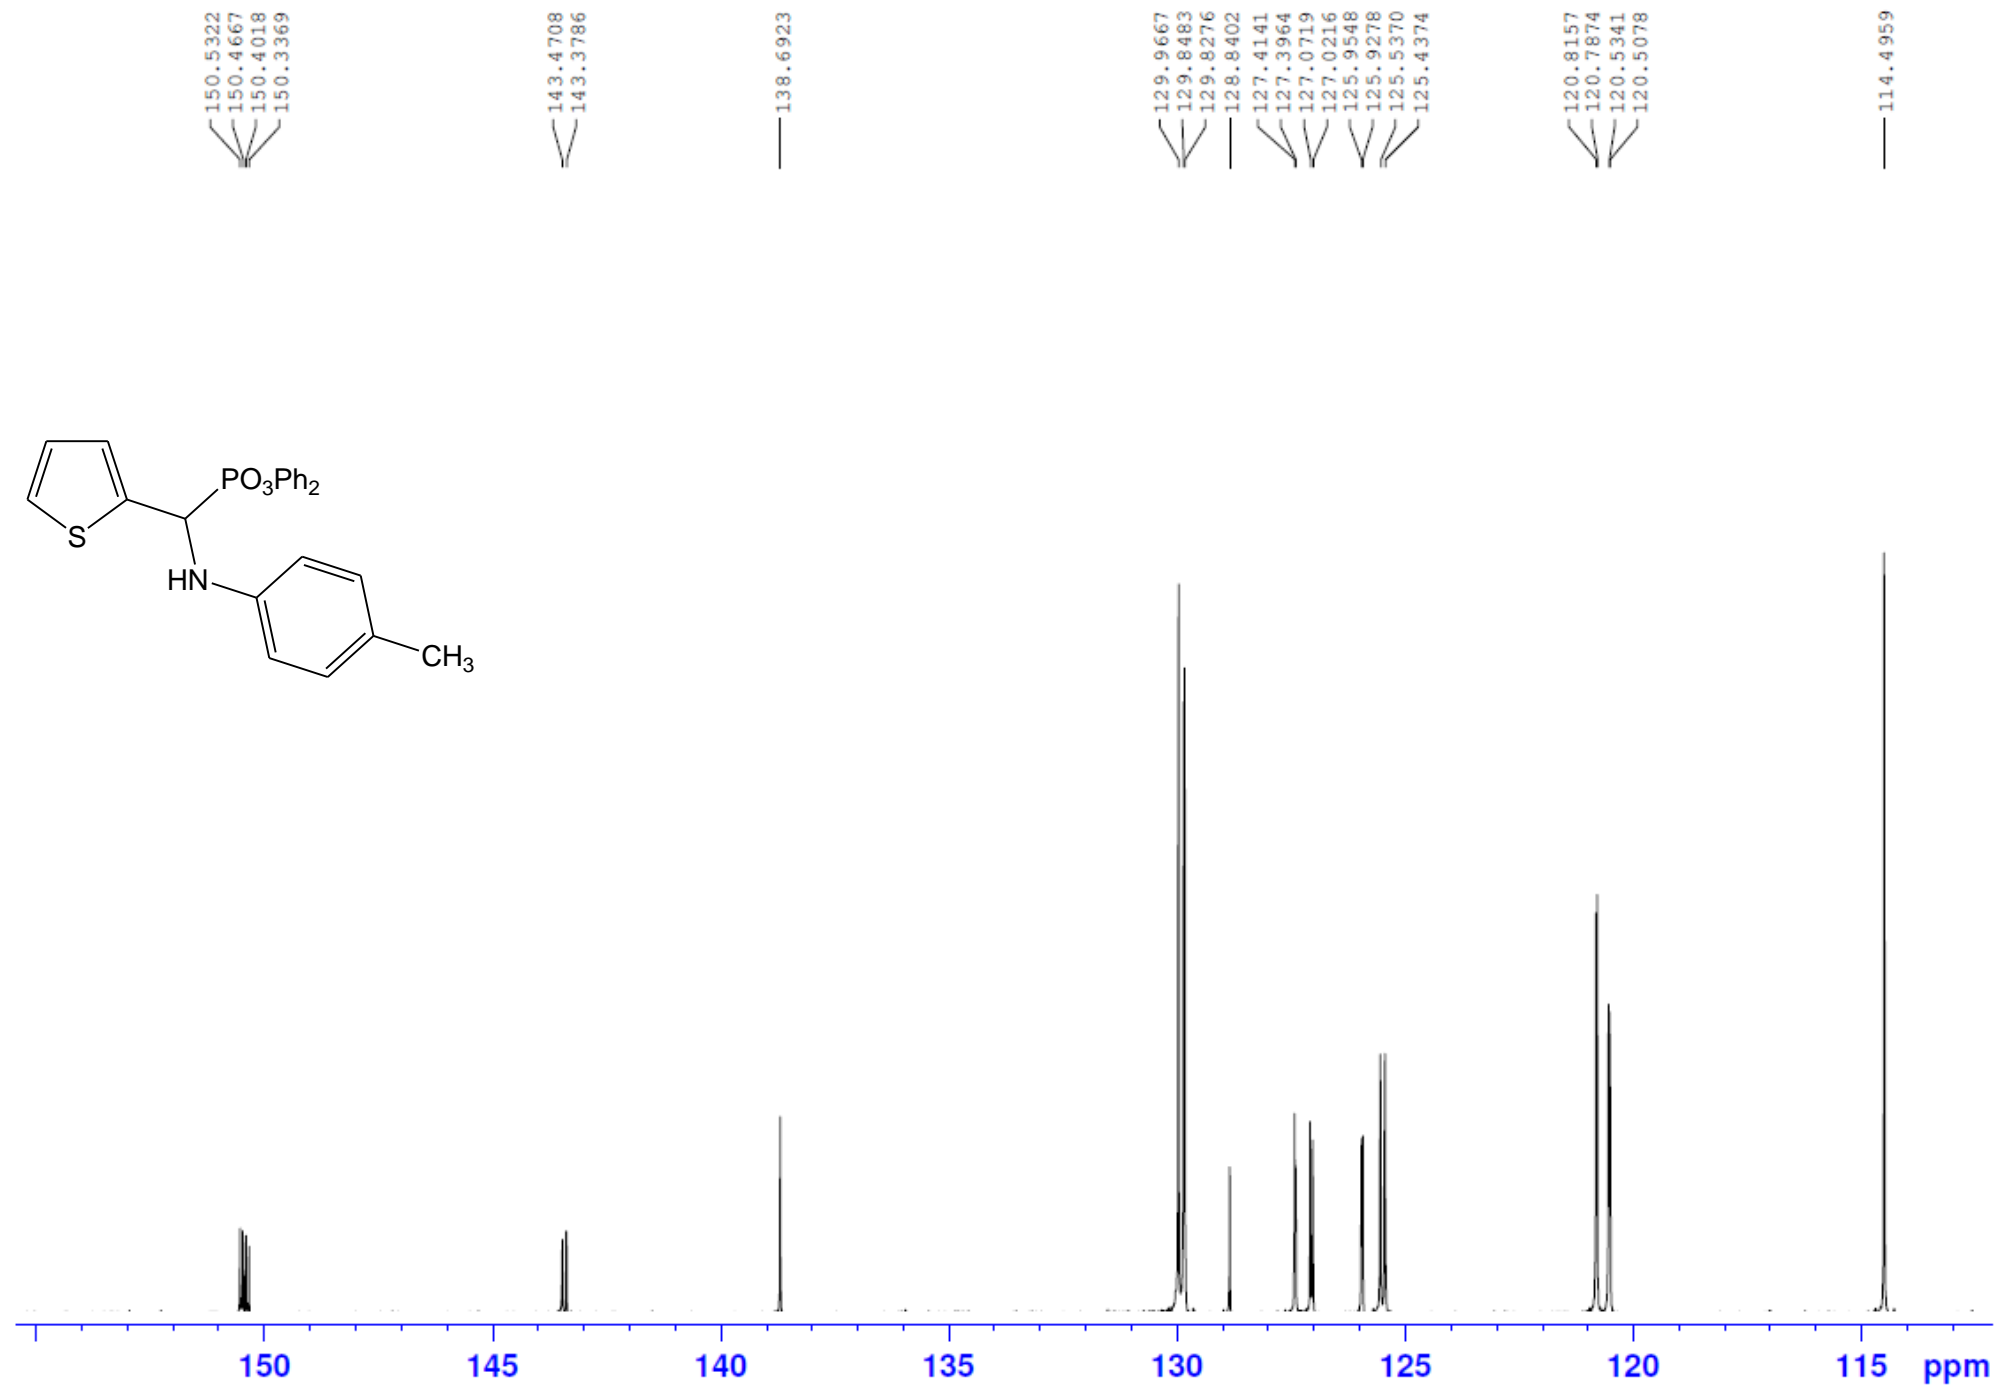

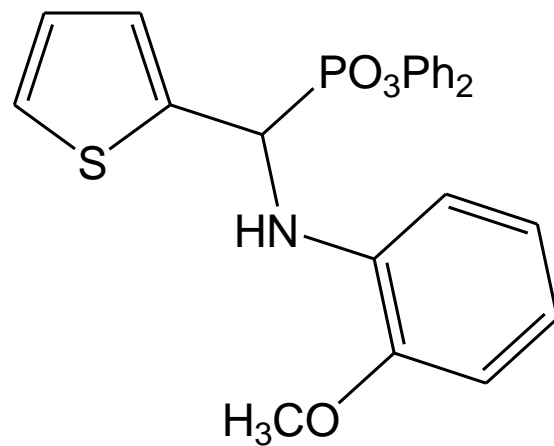

Fig. S4.  $^1\text{H}$  NMR,  $^{13}\text{C}$  NMR,  $^{31}\text{P}$  NMR spectra of diphenyl N-(2-methoxyphenyl)amino(2-thienyl)methylphosphonate (**4**)

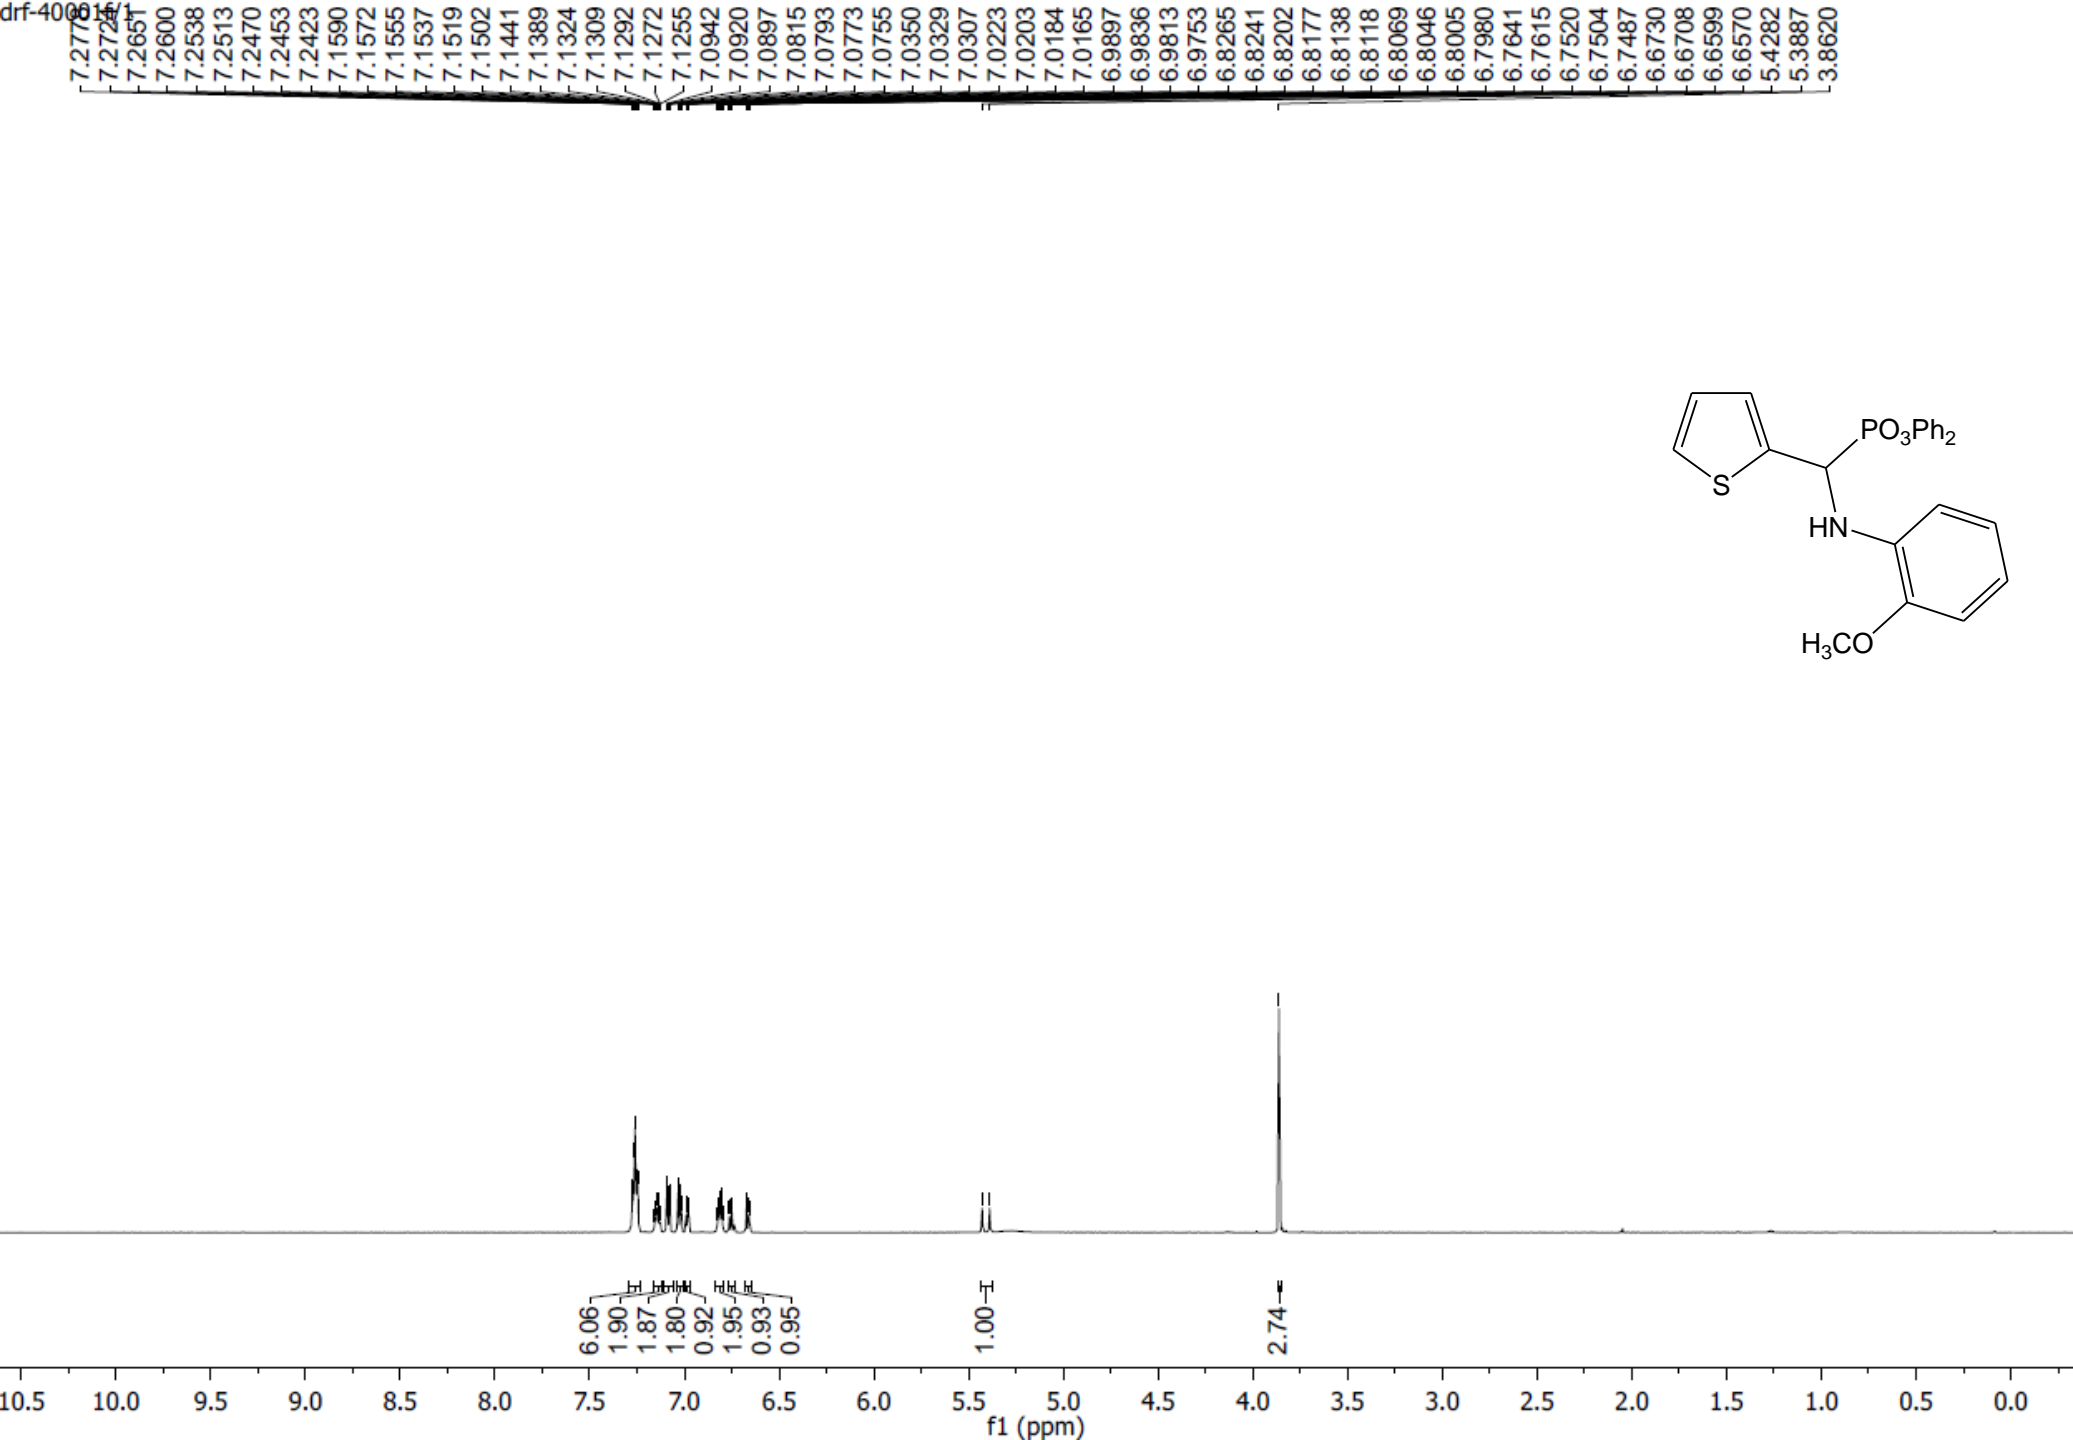

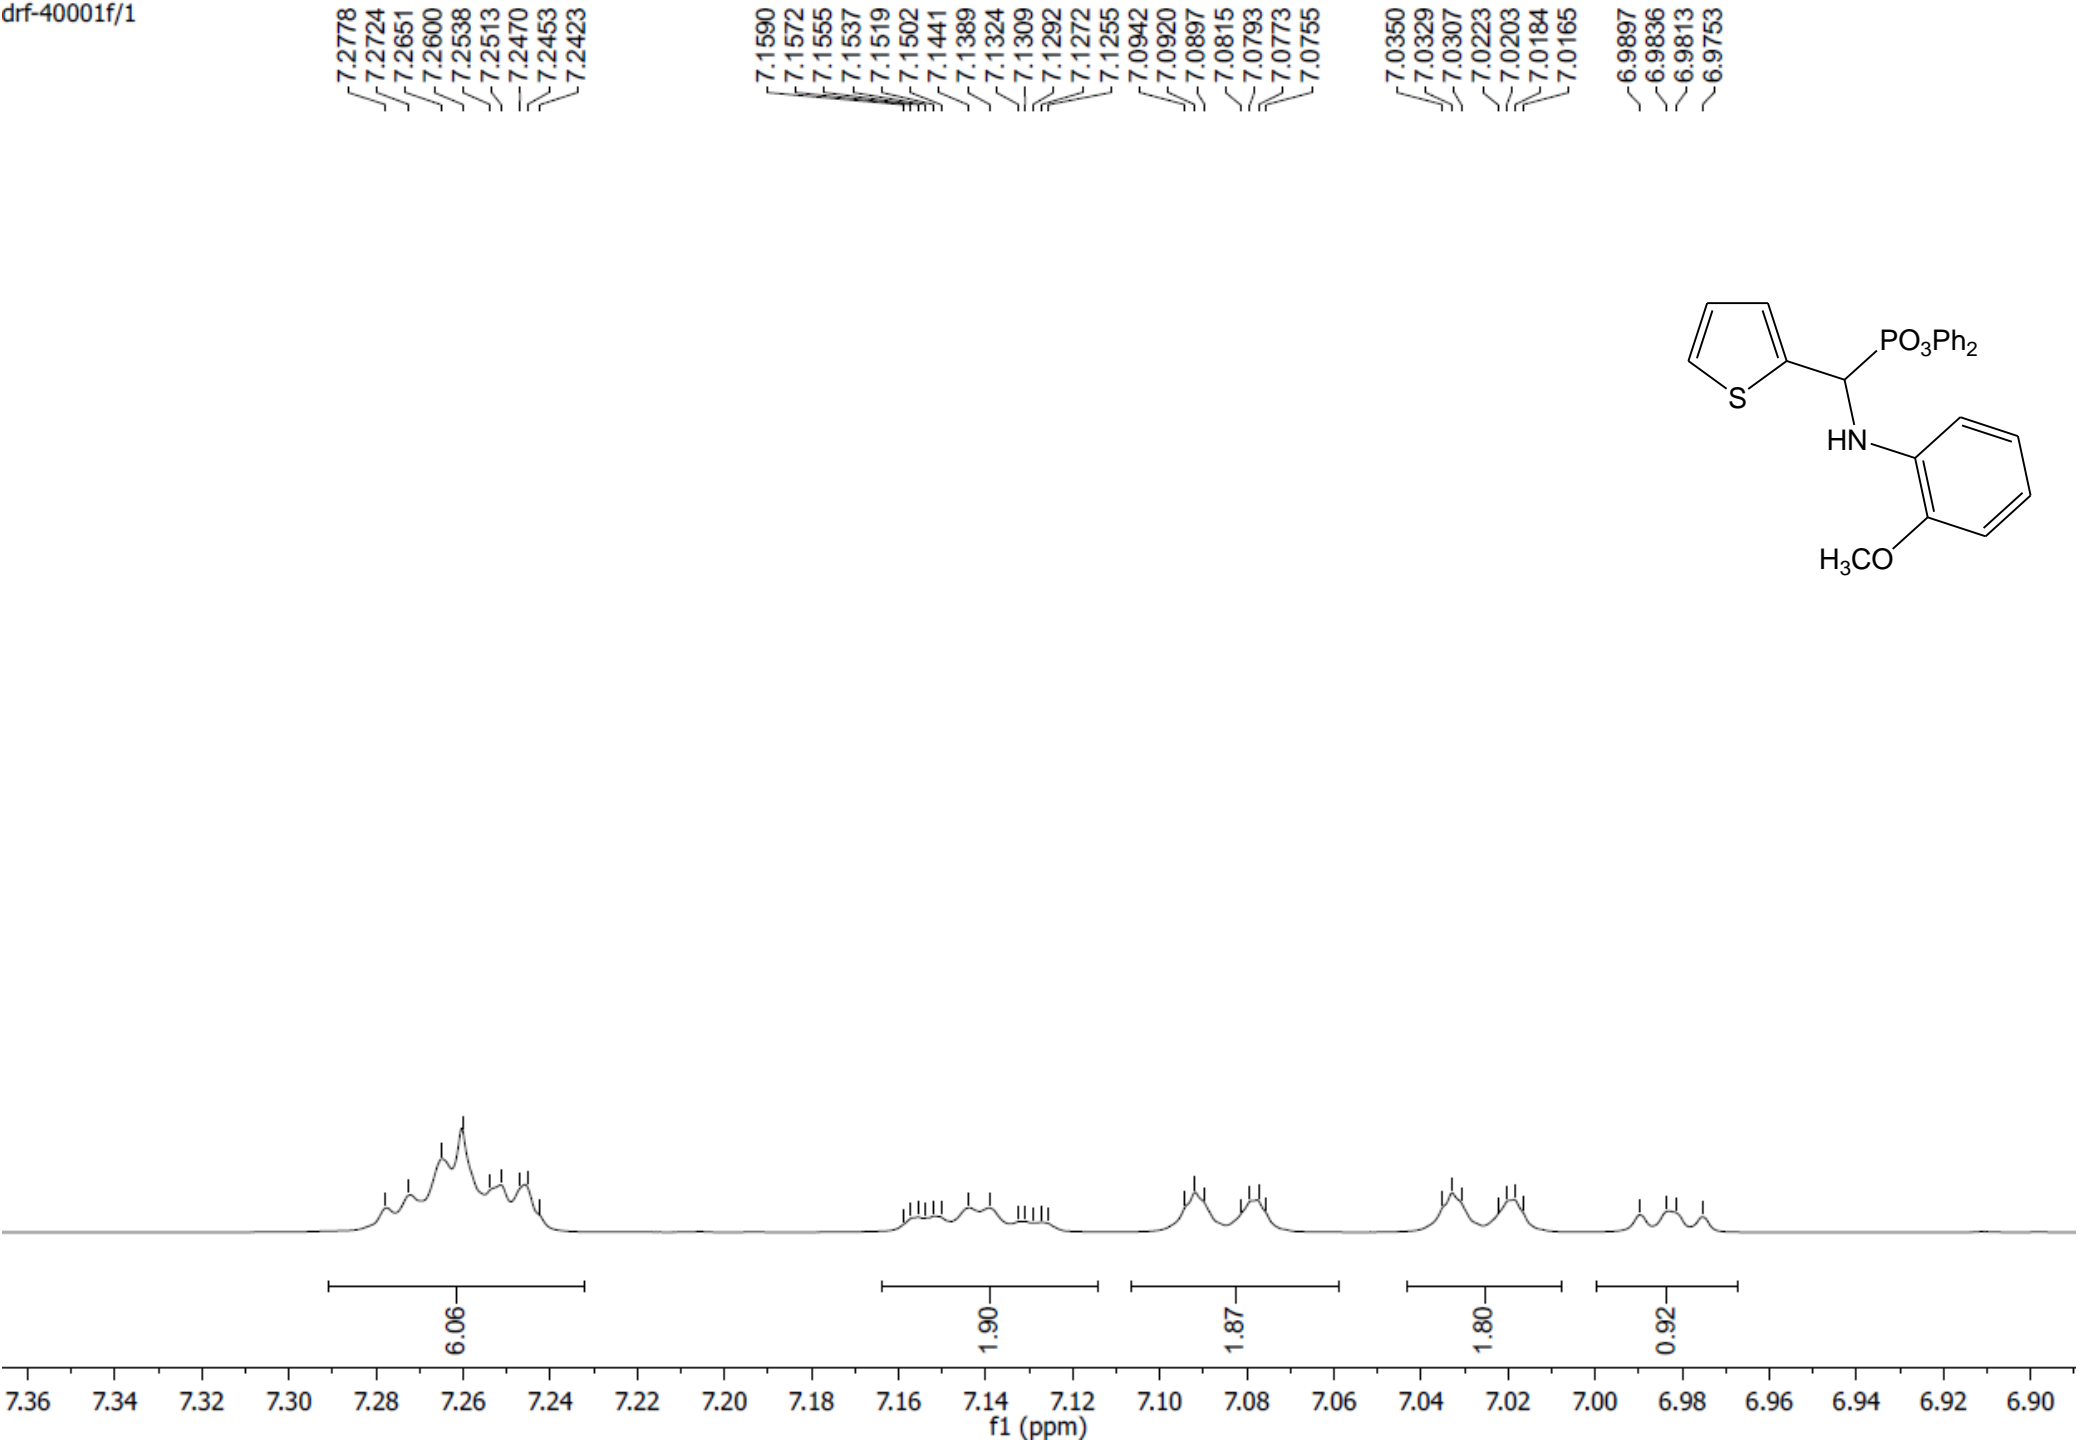

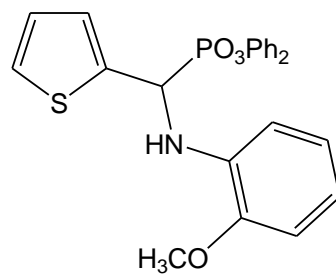

6.8265  
6.8241  
6.8202  
6.8177  
6.8138  
6.8118  
6.8069  
6.8046  
6.8005  
6.7980

6.7641  
6.7615  
6.7520  
6.7504  
6.7487

6.6730  
6.6708  
6.6599  
6.6570

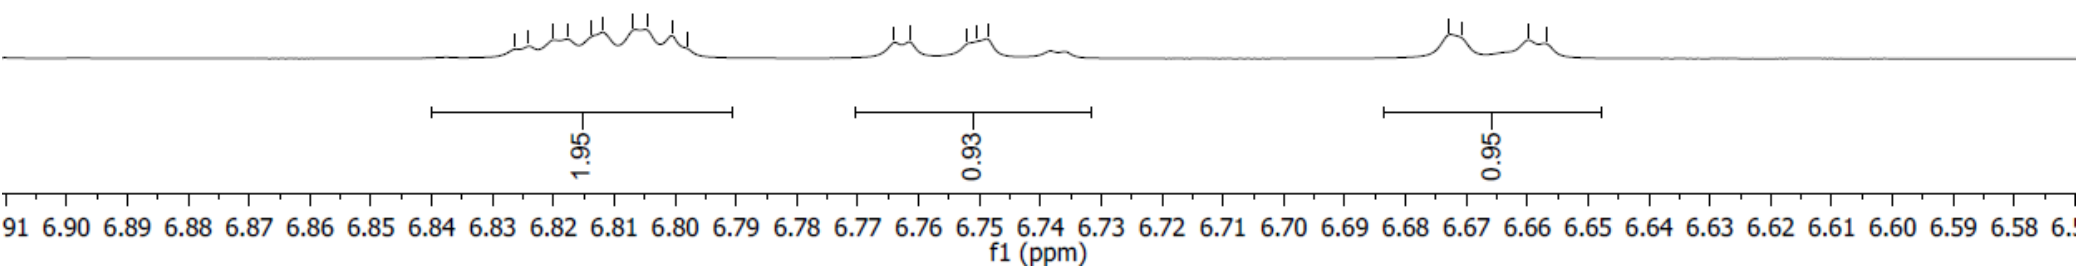



—13.3687

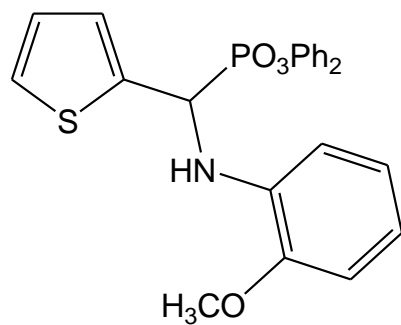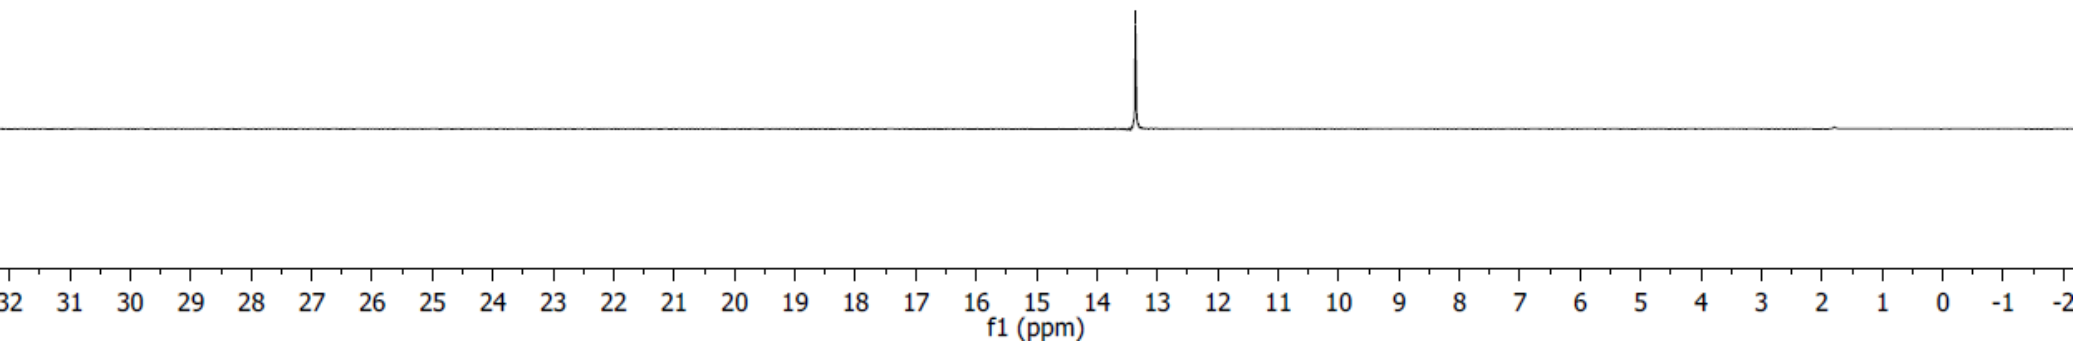

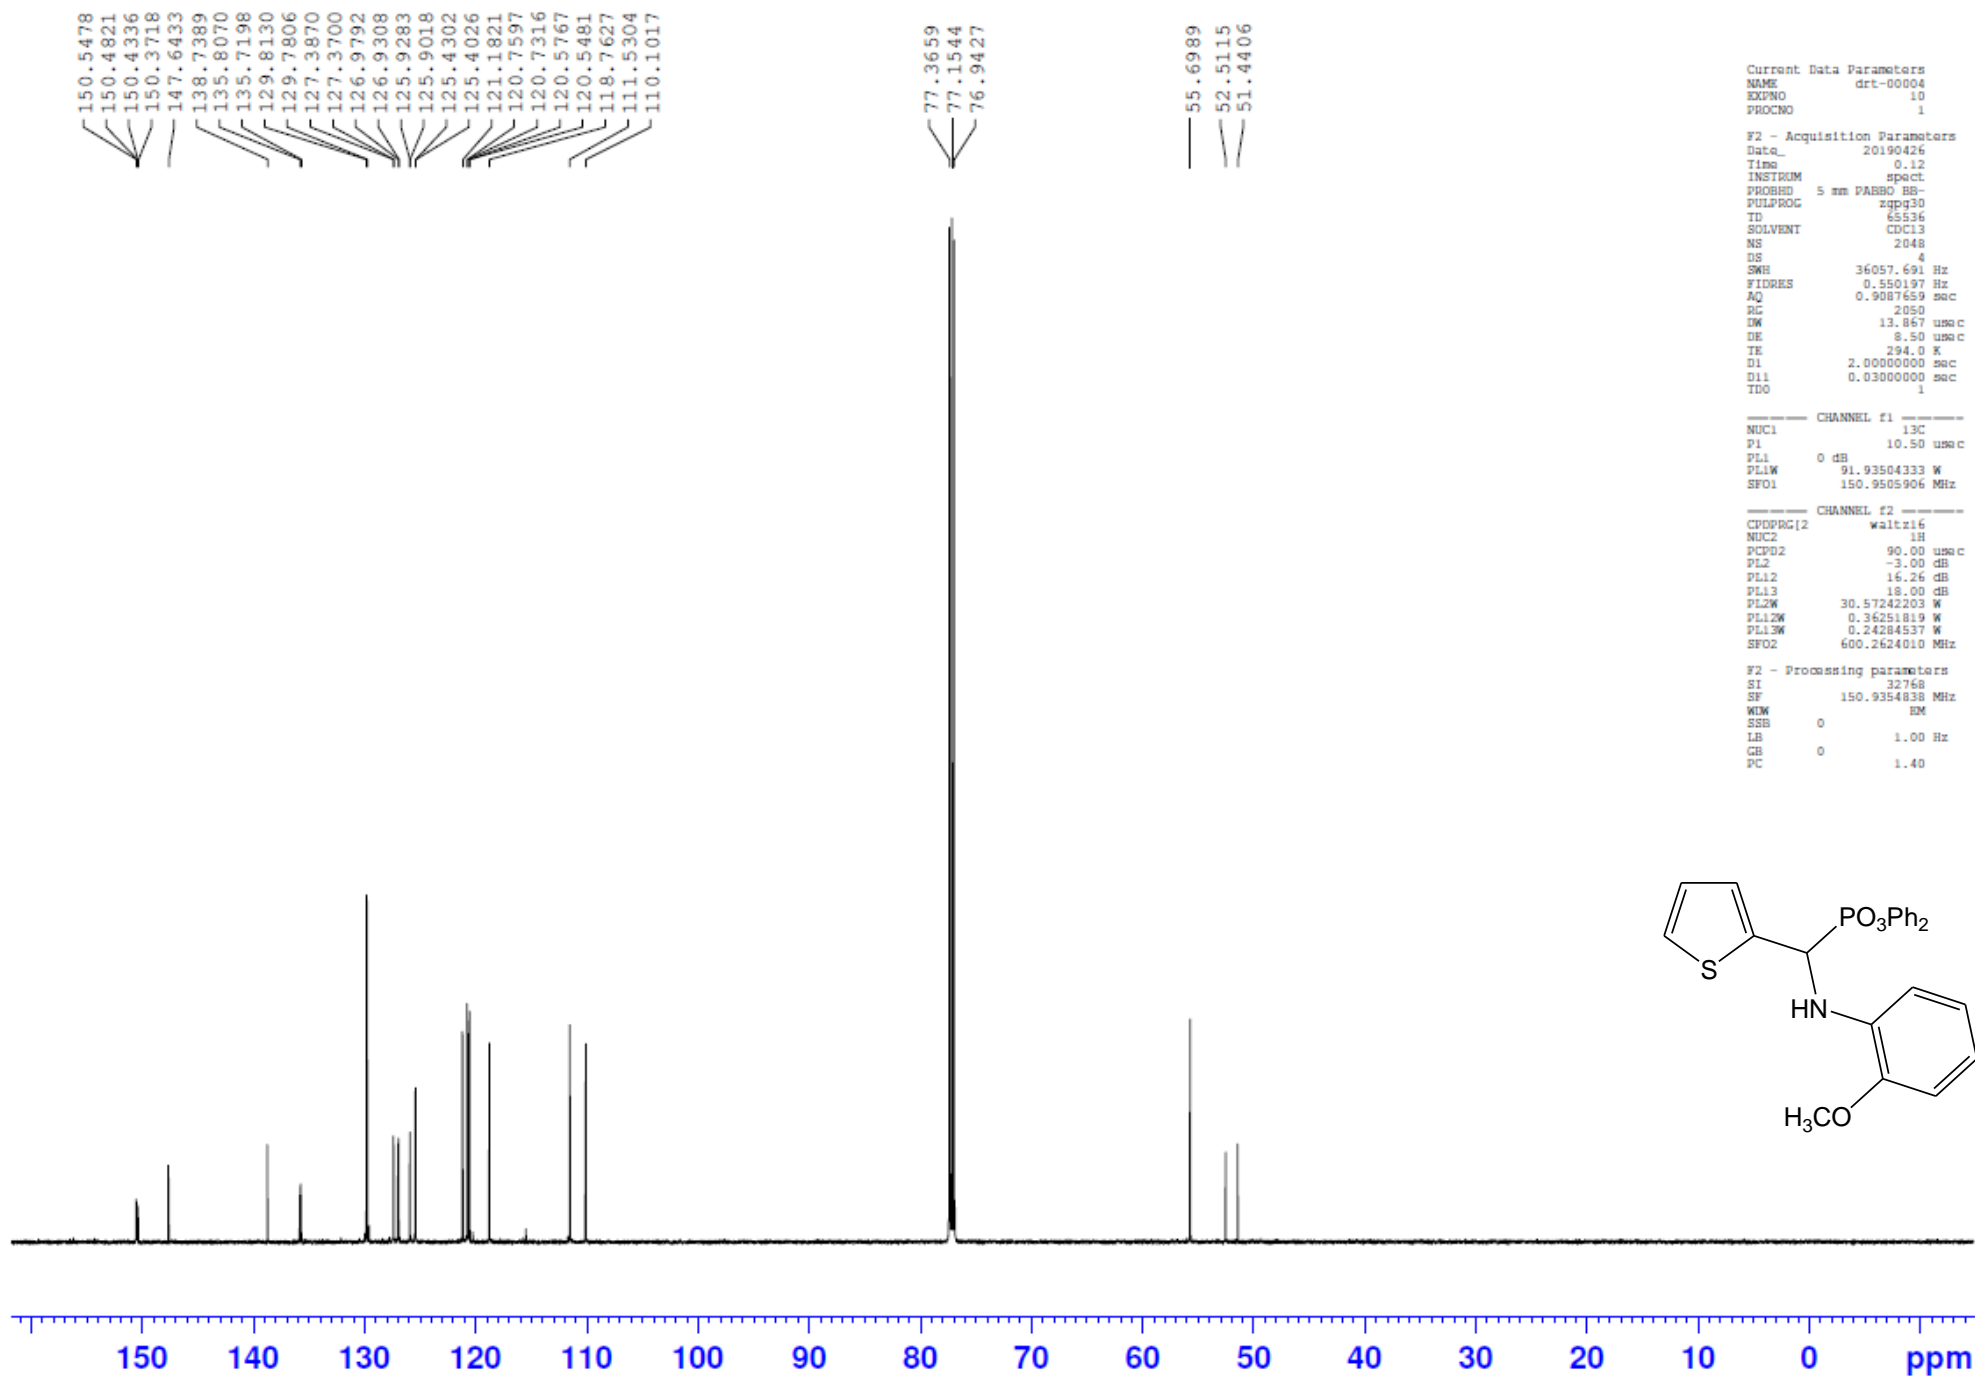

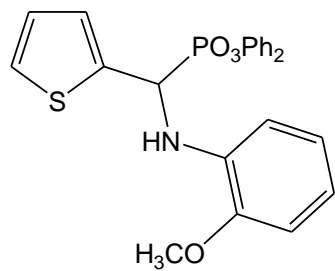

150.5478  
150.4821  
150.4336  
150.3718  
147.6433

138.7389

135.8070  
135.7198

129.8130  
129.7806  
127.3870  
127.3700  
126.9792  
126.9308  
125.9283  
125.9018  
125.4302  
125.4026

121.1821  
120.7597  
120.7316  
120.5767  
120.5481  
118.7627

111.5304

110.1017

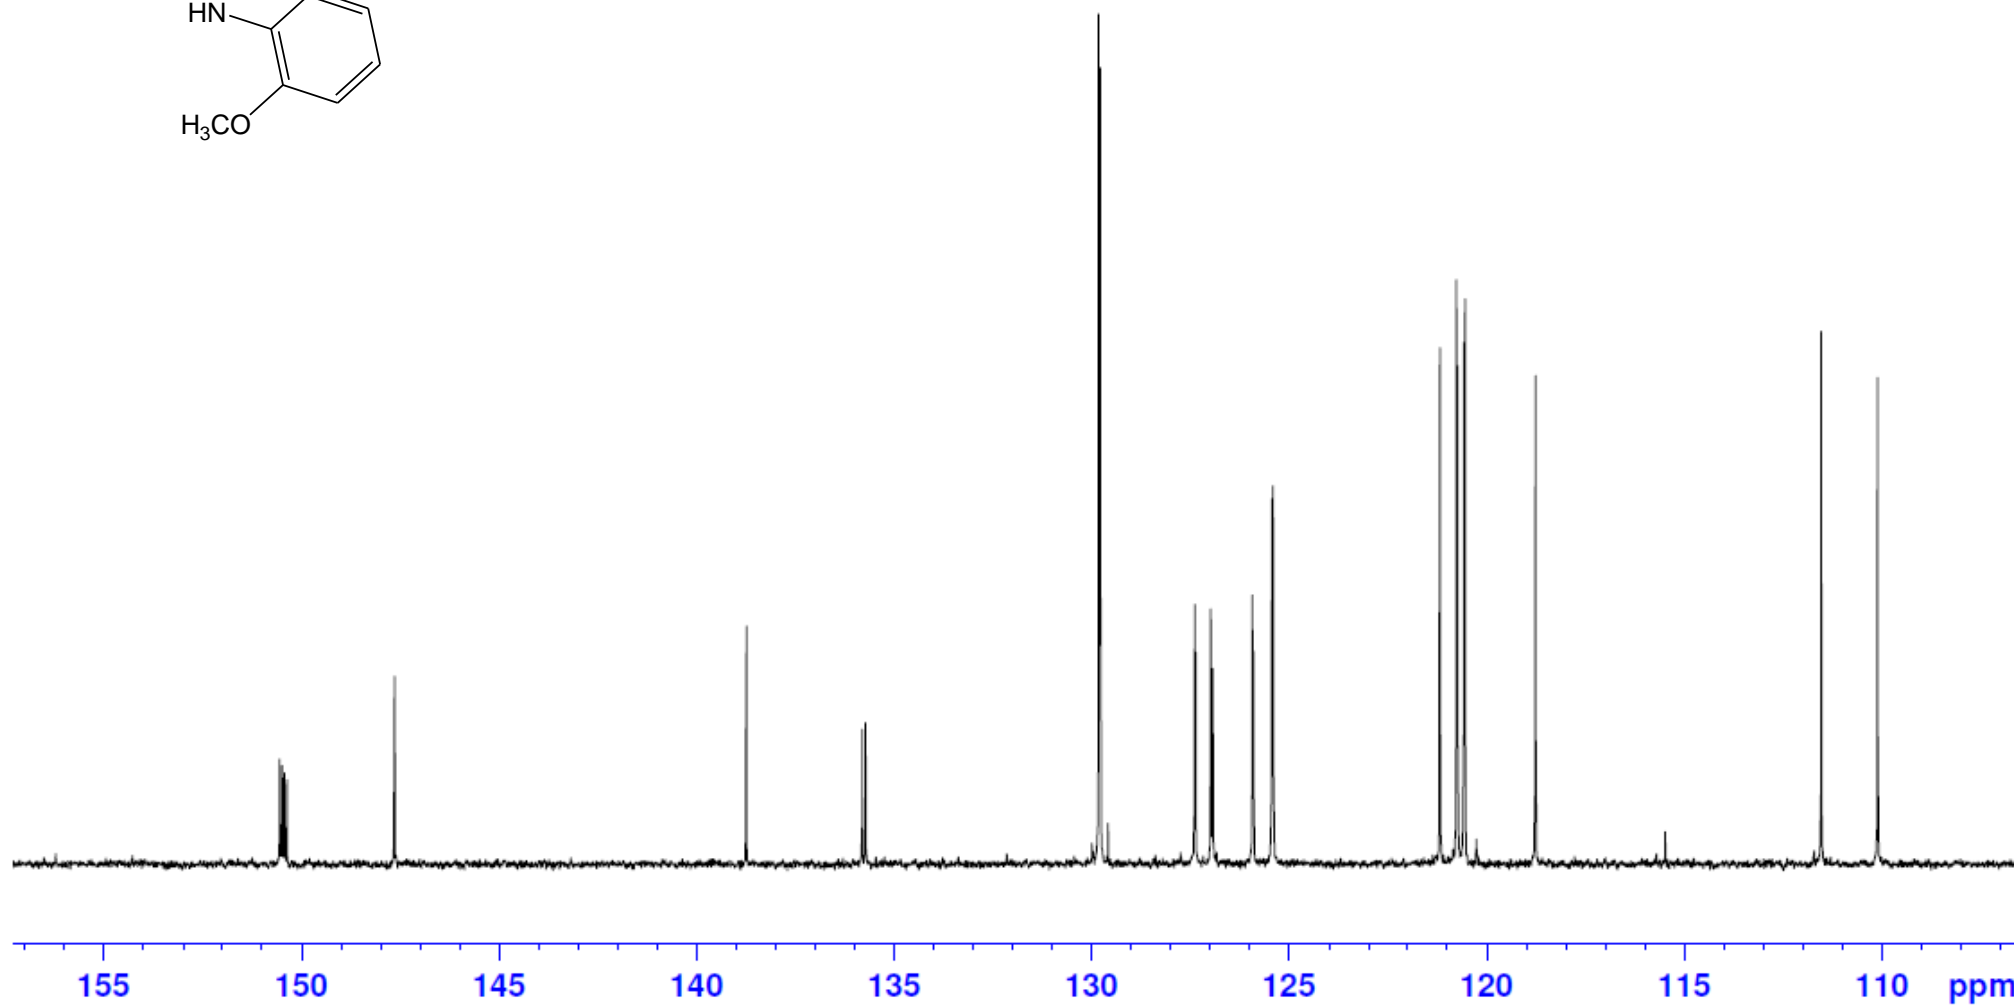

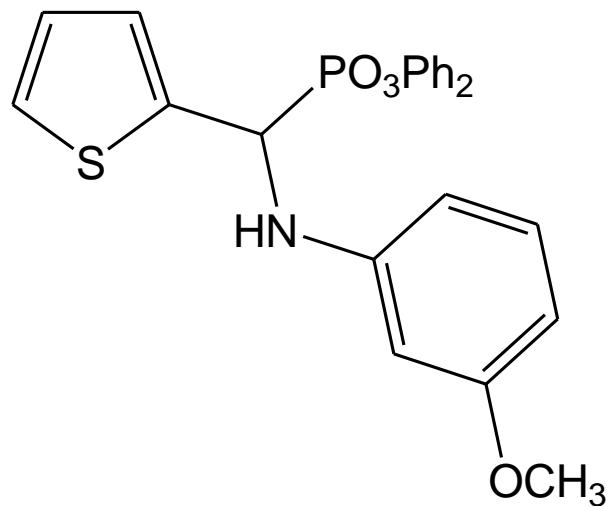

Fig. S5.  $^1\text{H}$  NMR,  $^{13}\text{C}$  NMR,  $^{31}\text{P}$  NMR spectra of diphenyl N-(3-methoxyphenyl)amino(2-thienyl)methylphosphonate (**5**)

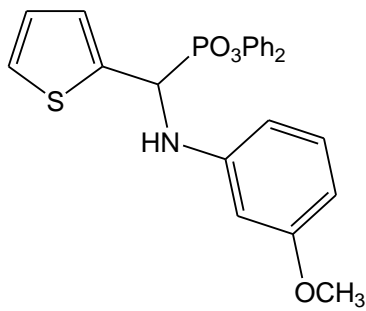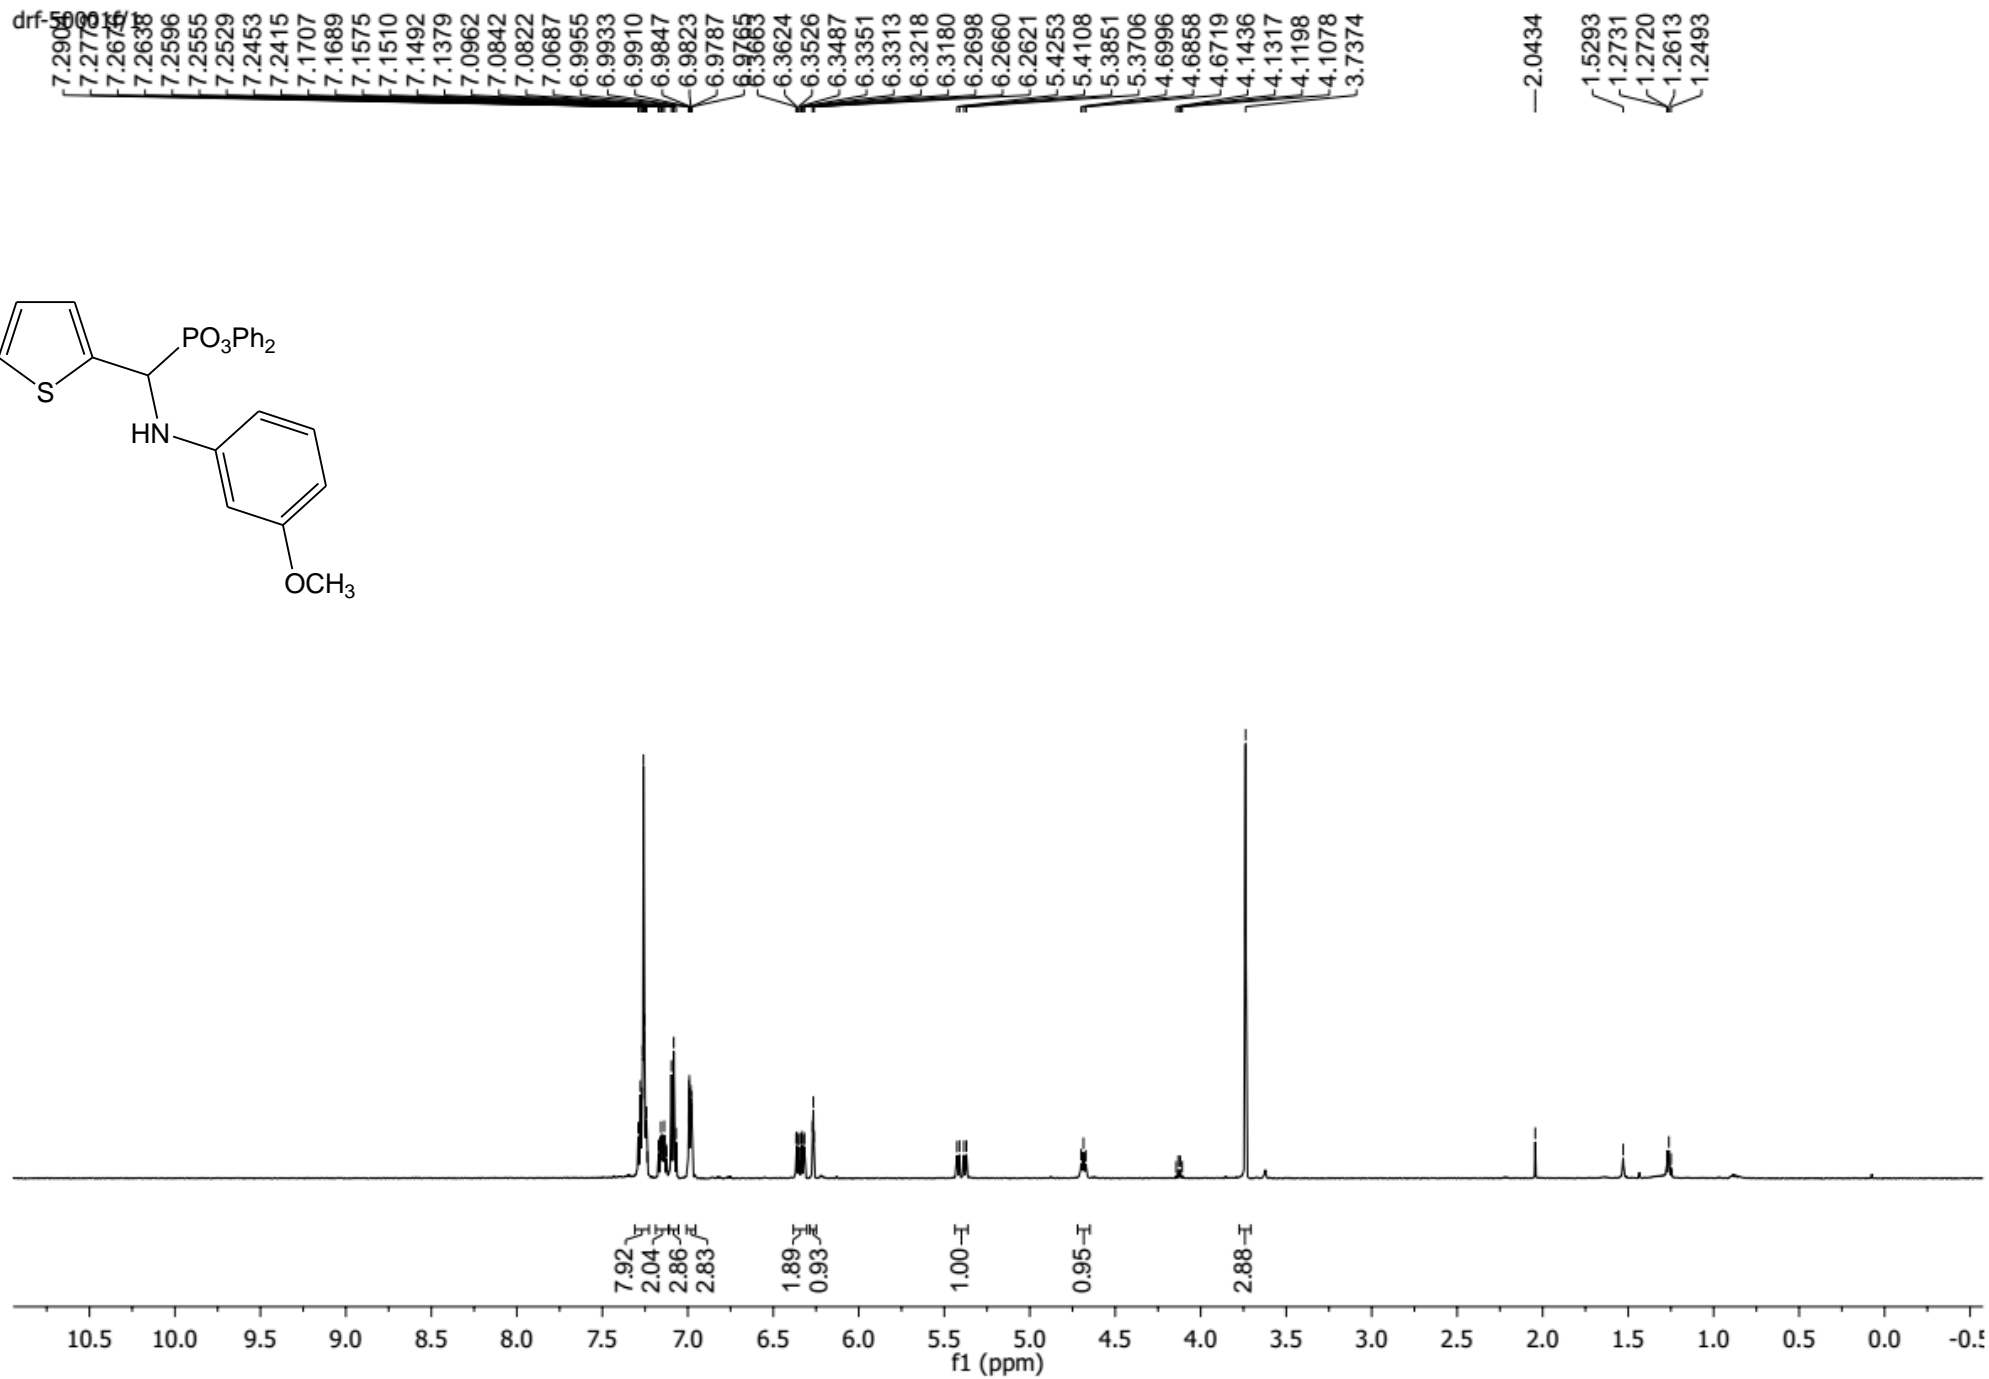

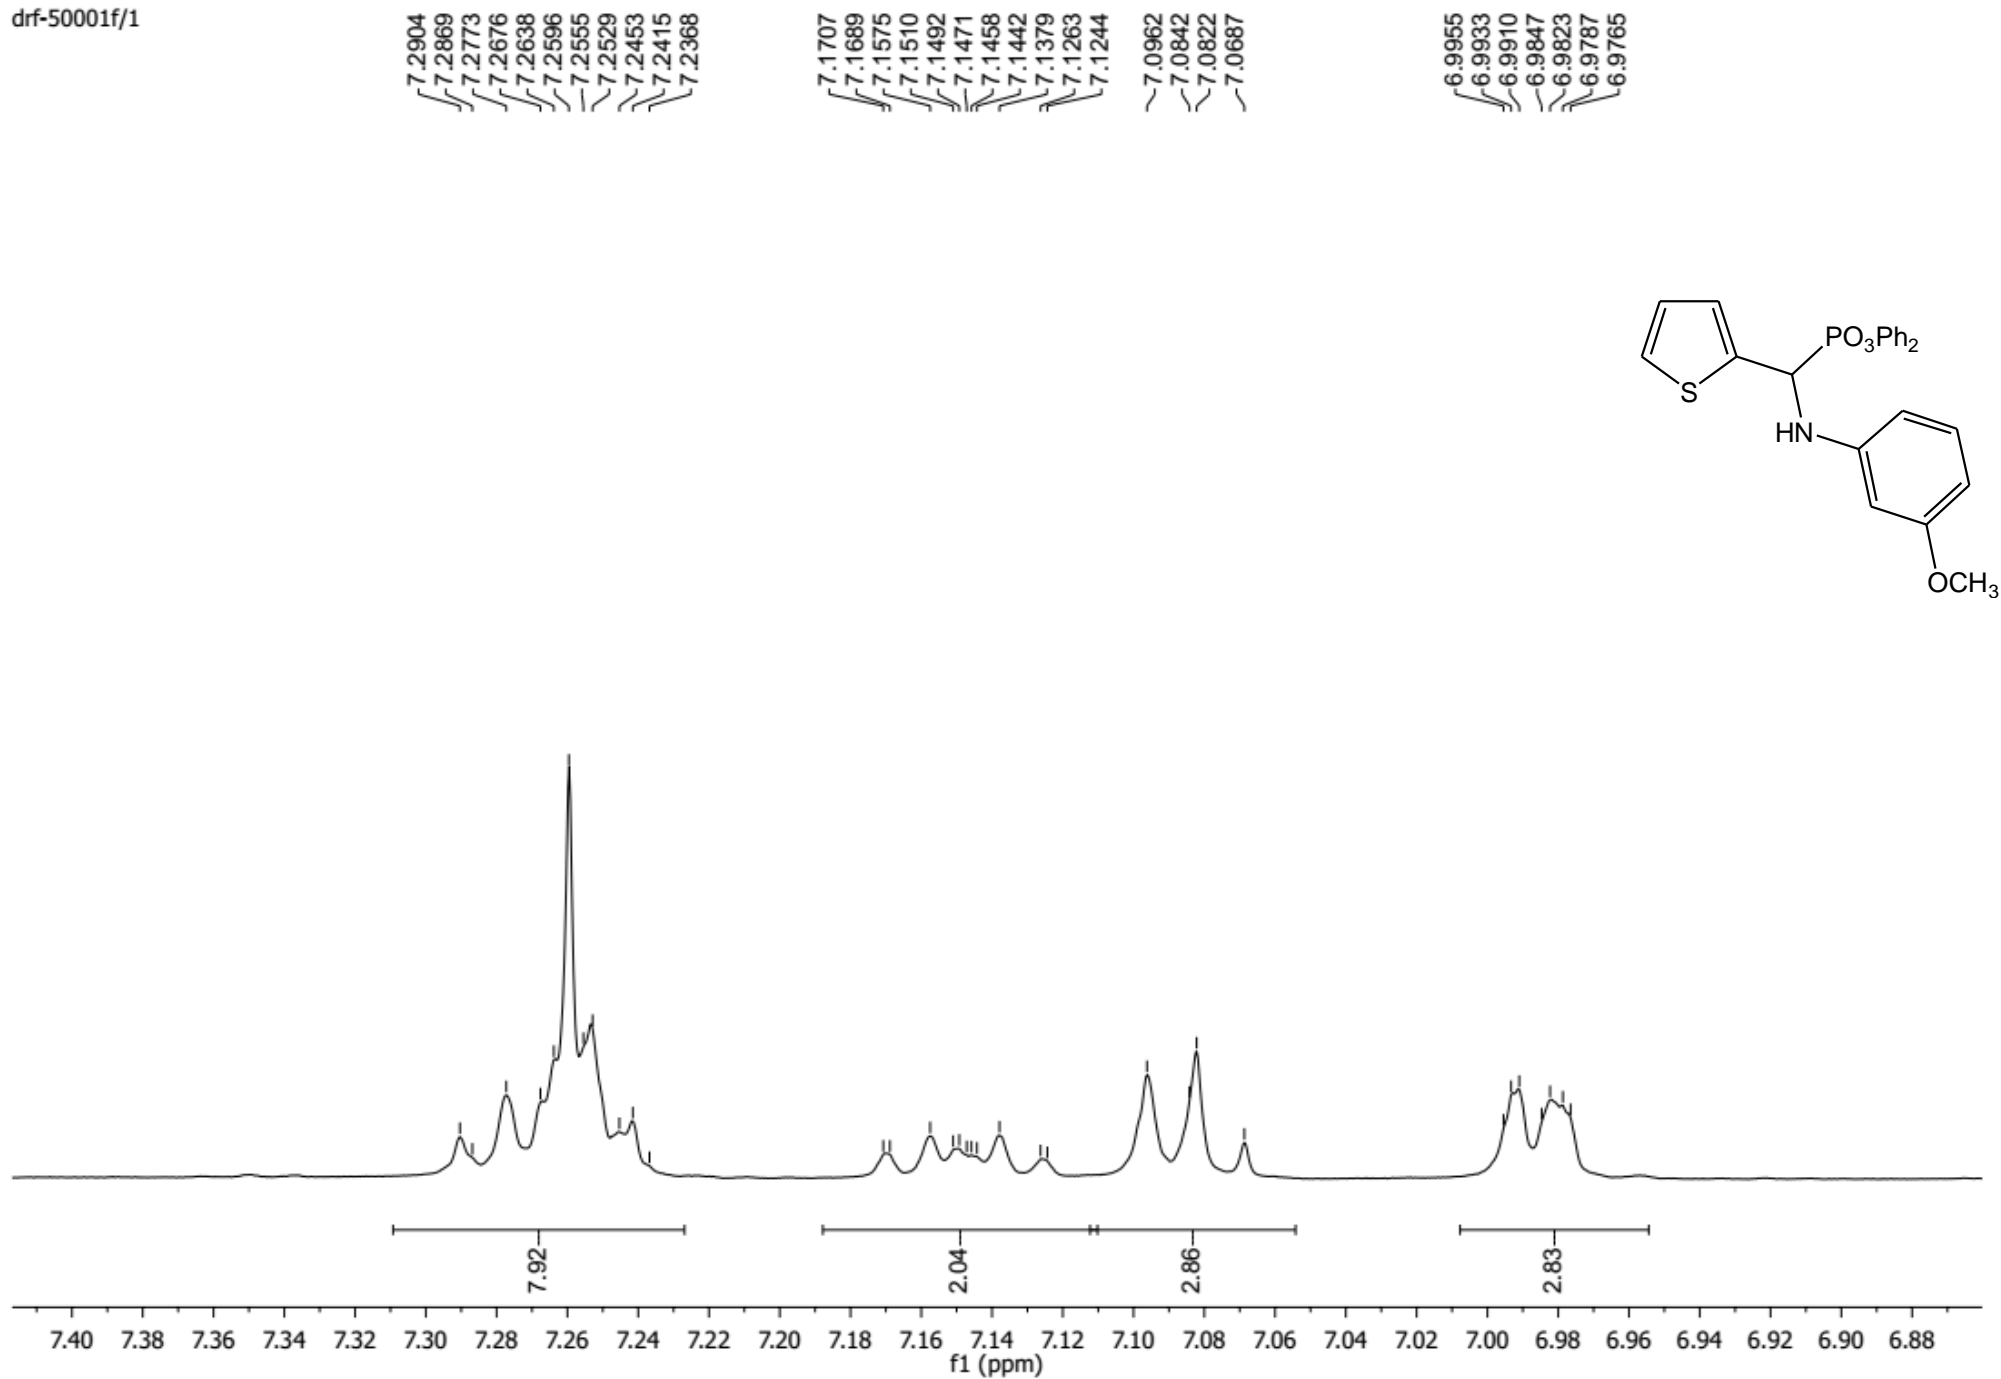

drf-50001f/1

6.3663  
6.3624  
6.3526  
6.3487  
6.3351  
6.3313  
6.3218  
6.3180  
6.2698  
6.2660  
6.2621

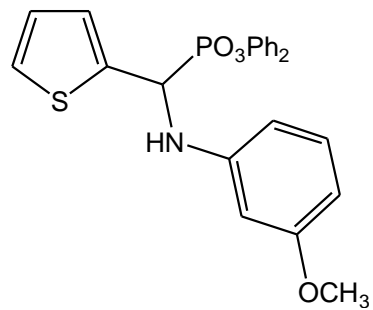

5.4253  
5.4108  
5.3851  
5.3706

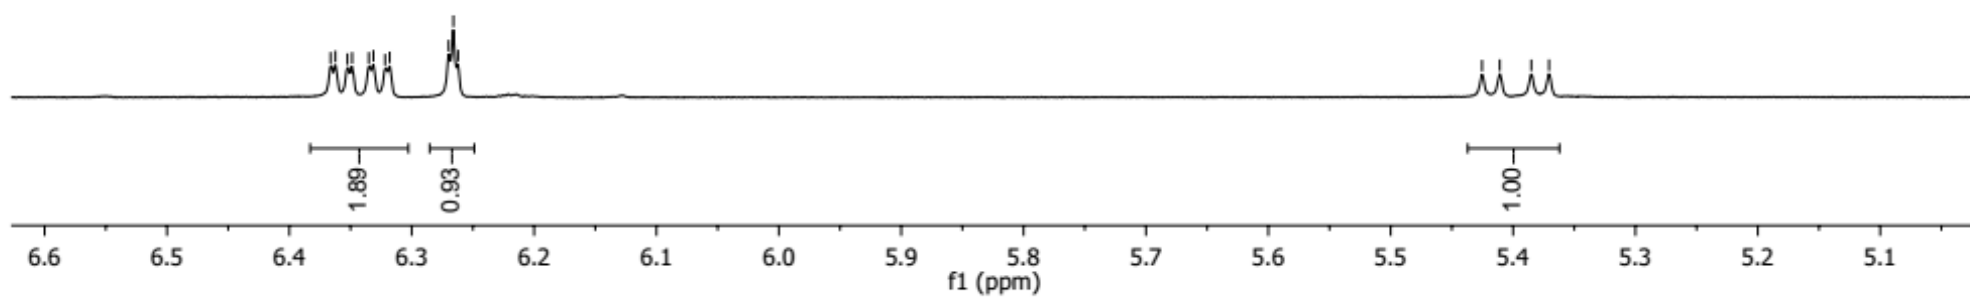

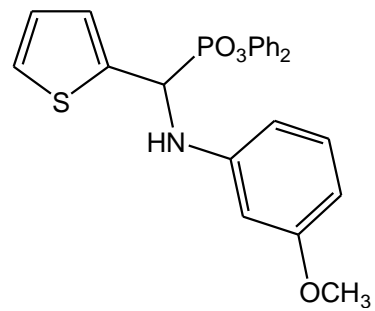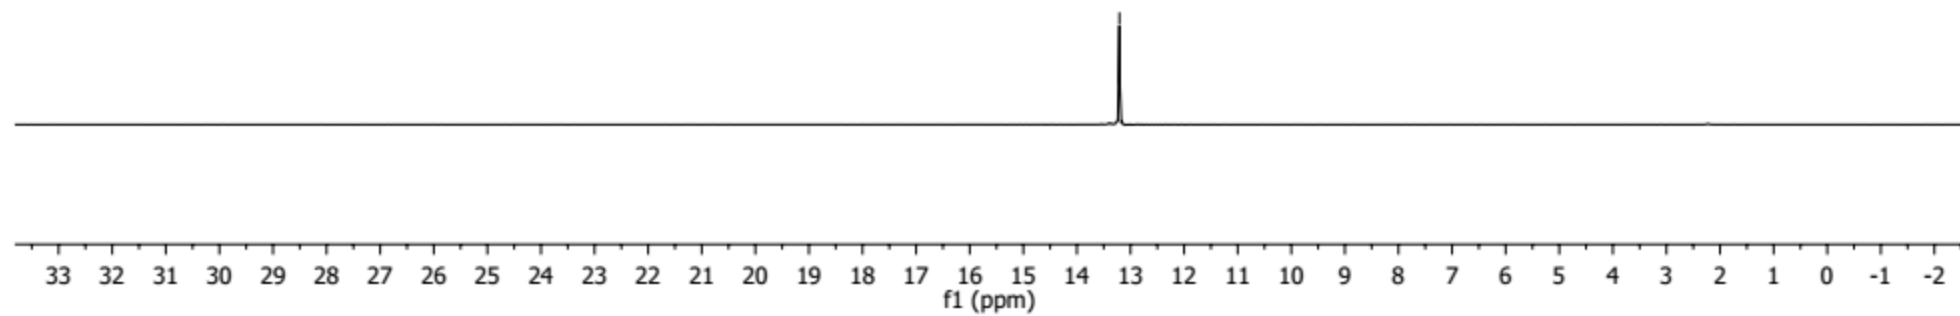





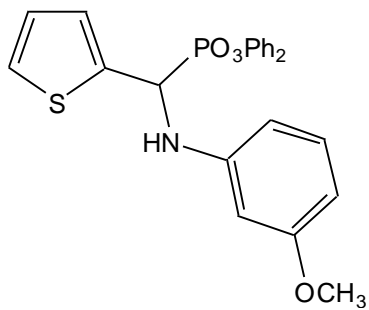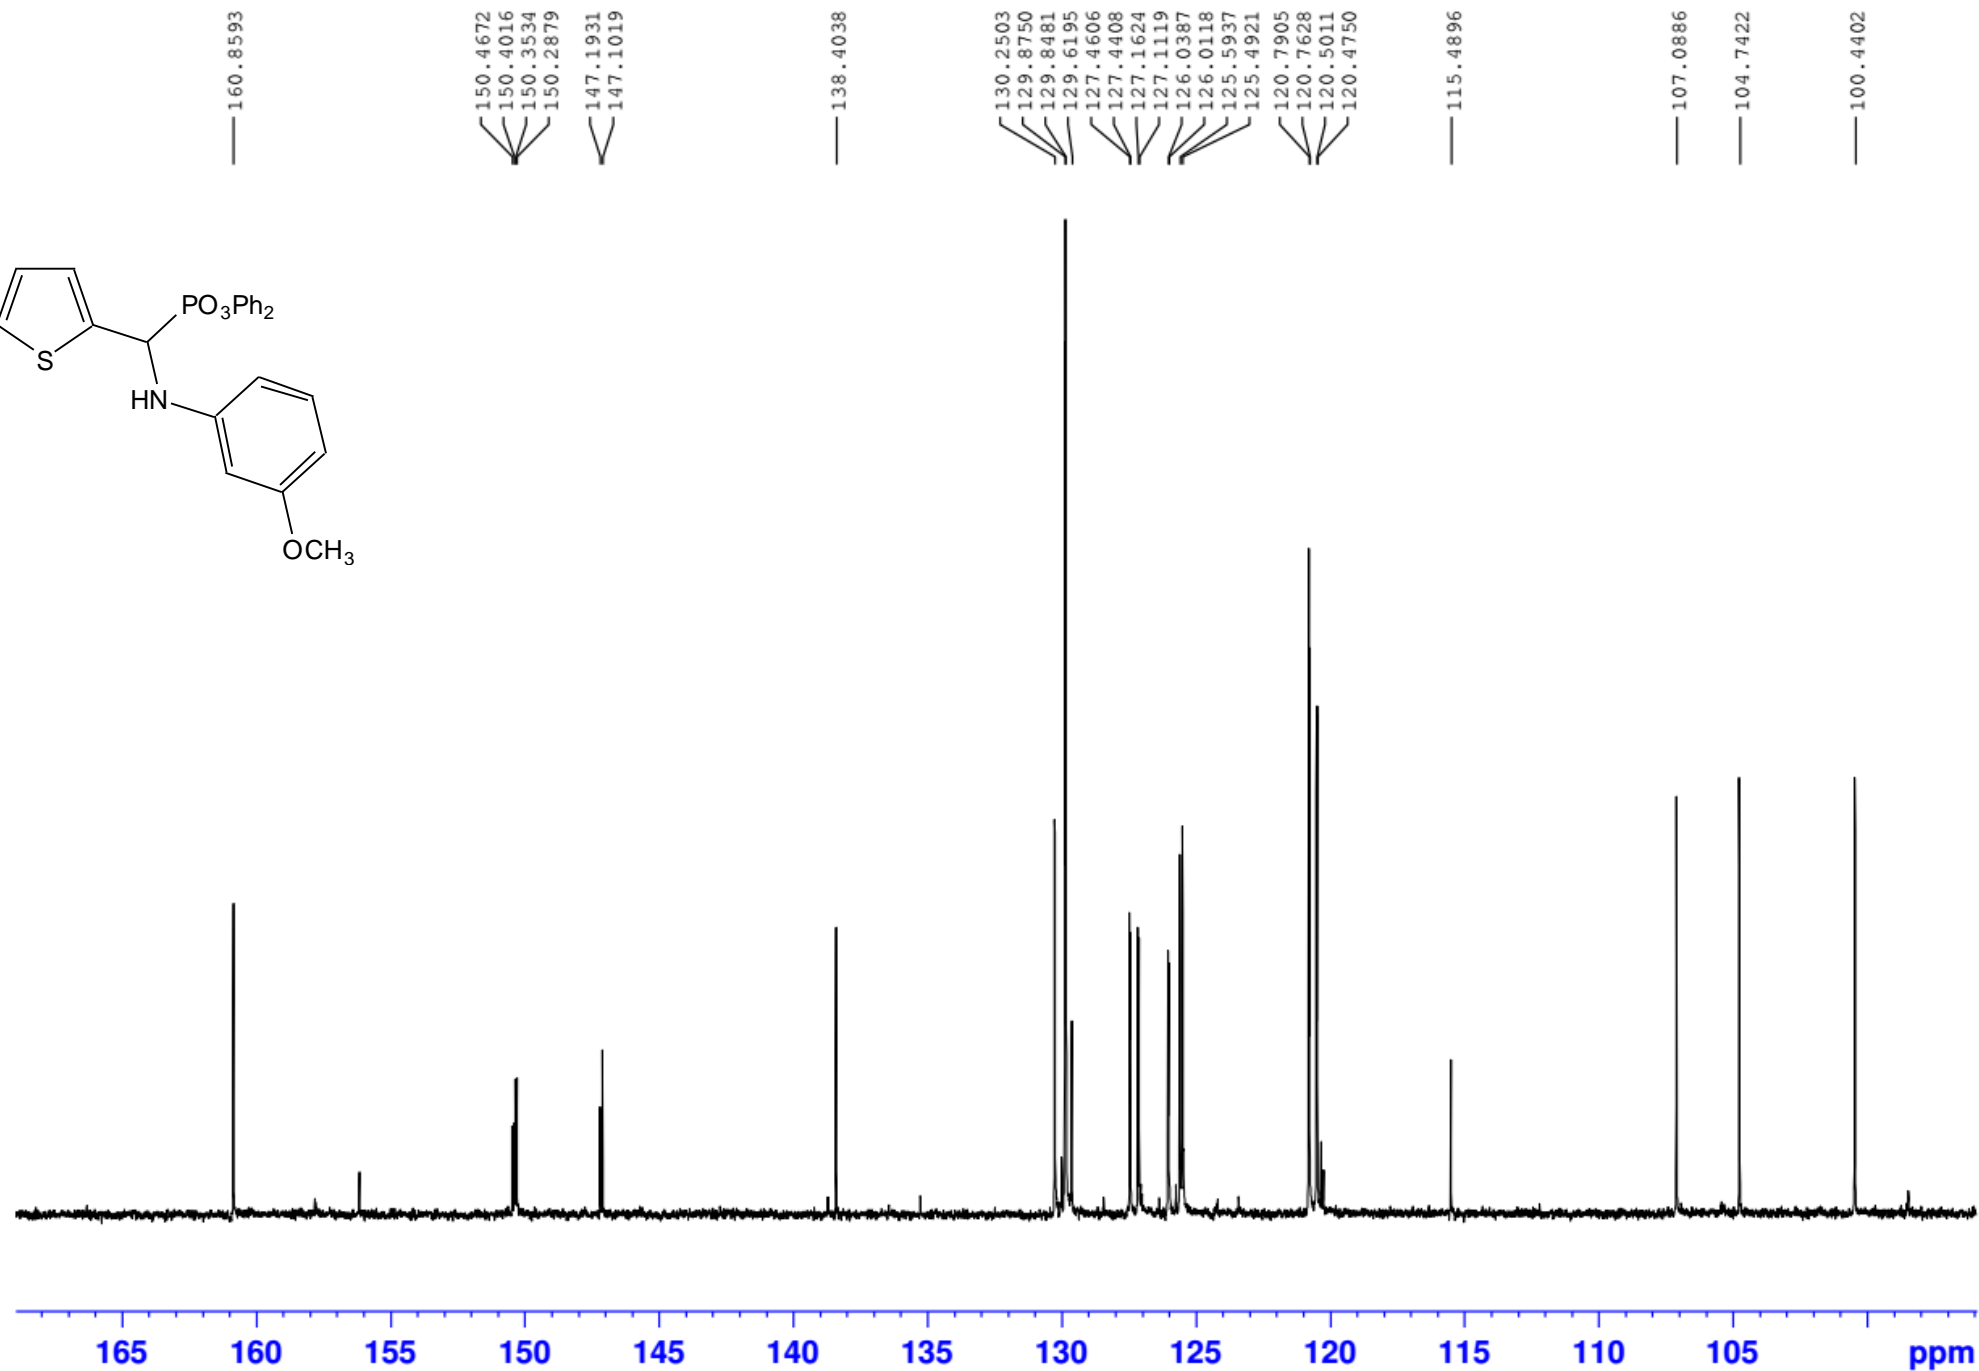

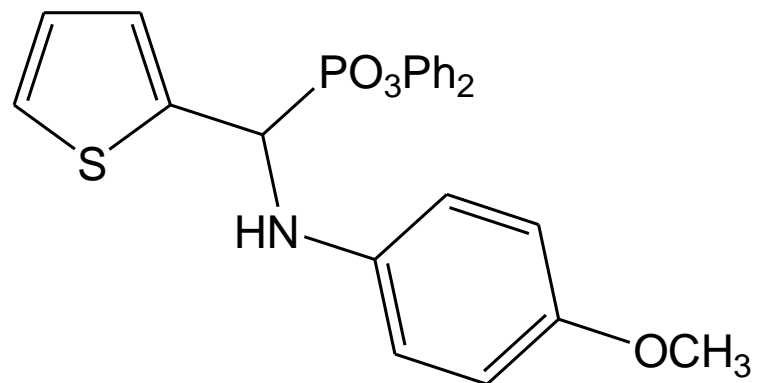

Fig. S6.  $^1\text{H}$  NMR,  $^{13}\text{C}$  NMR,  $^{31}\text{P}$  NMR spectra of diphenyl N-(4-methoxyphenyl)amino(2-thienyl)methylphosphonate (**6**)

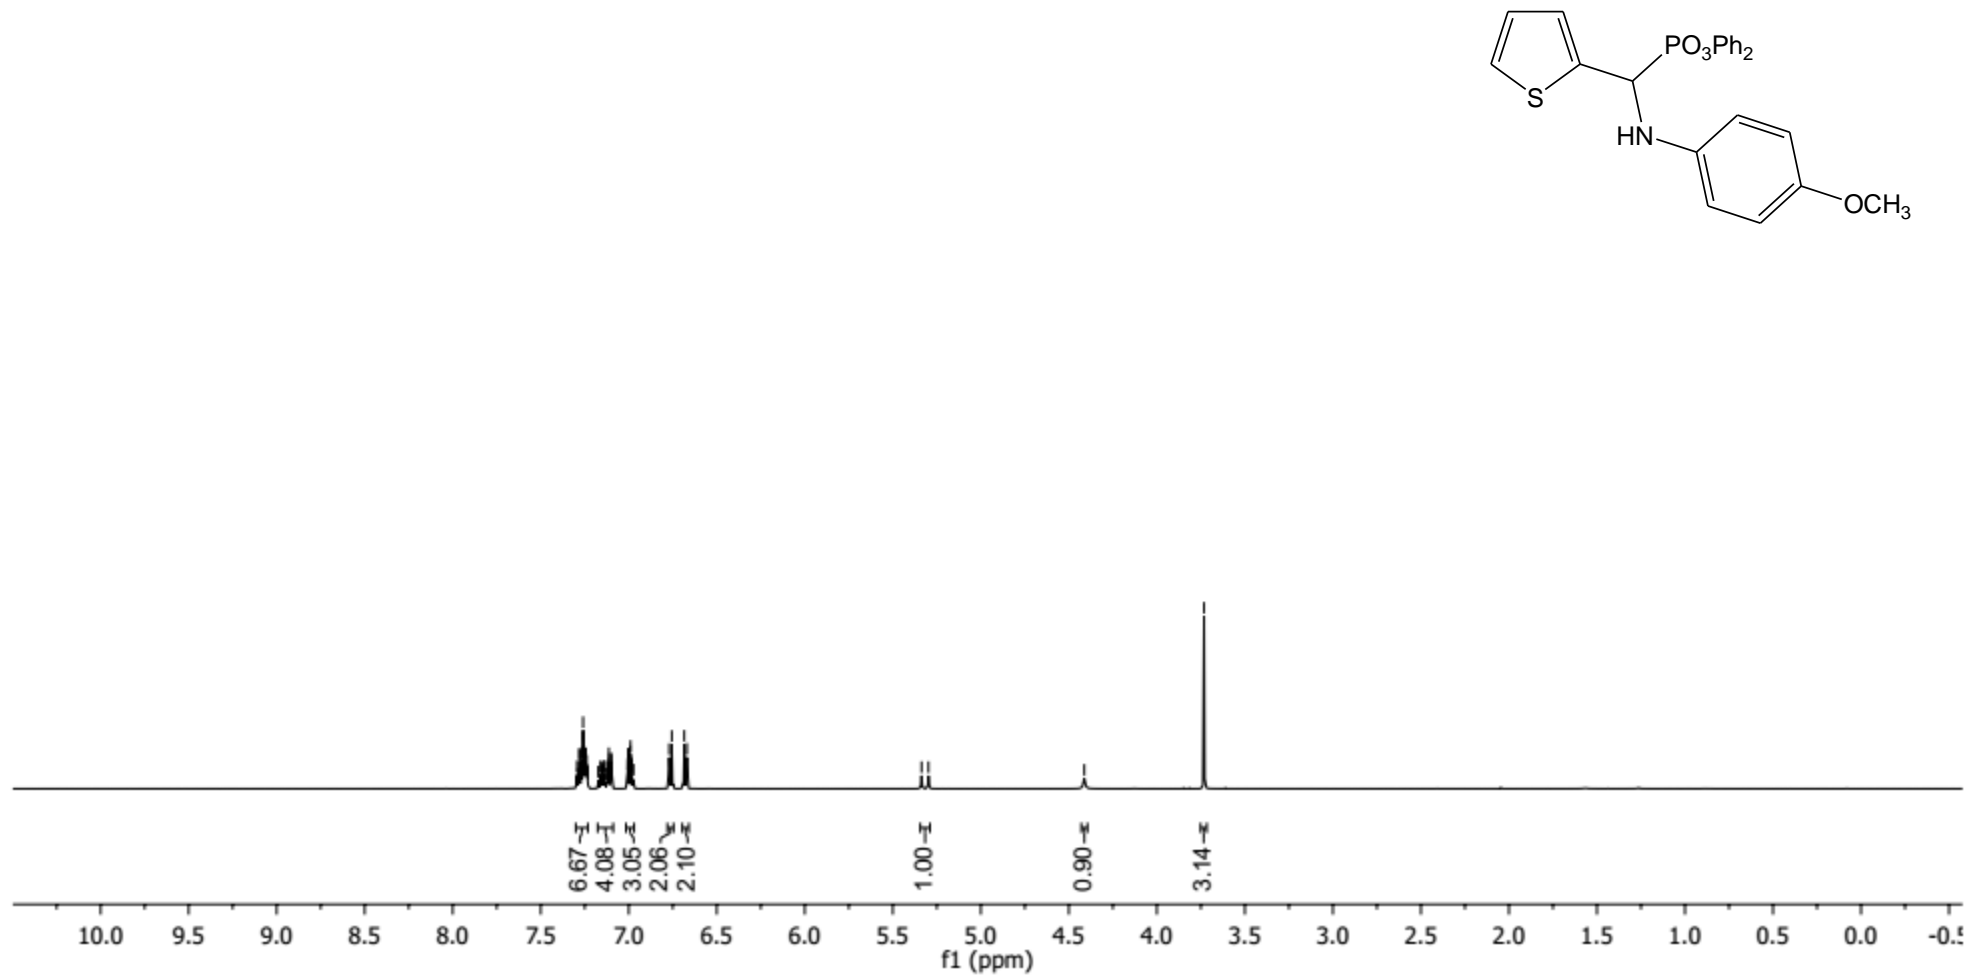

7.2933  
7.2904  
7.2816  
7.2795  
7.2695  
7.2673  
7.2596  
7.2570  
7.2547  
7.2512  
7.2488  
7.2463  
7.2432  
7.2390  
7.2349  
7.2334  
7.2318  
7.1717  
7.1700  
7.1592  
7.1576  
7.1503  
7.1486  
7.1469  
7.1452  
7.1375  
7.1361  
7.1255  
7.1238  
7.1152  
7.1130  
7.1111  
7.1096  
7.1073  
7.1037  
7.1022  
7.1005  
7.0985  
7.0966  
7.0066  
7.0045  
7.0025  
7.0011  
6.9990  
6.9954  
6.9937  
6.9916  
6.9900  
6.9881  
6.9849  
6.9835  
6.9818  
6.9766  
6.9755  
6.7703  
6.7665  
6.7593  
6.7554  
6.6847  
6.6807  
6.6735  
6.6697  
5.3368  
5.2973  
4.4122  
3.7320

drt-60000f/10

7.2938  
7.2904  
7.2813  
7.2795  
7.2696  
7.2673  
7.2596  
7.2570  
7.2547  
7.2512  
7.2488  
7.2463  
7.2432  
7.2390  
7.2349  
7.2334  
7.2318

7.1717  
7.1700  
7.1592  
7.1576  
7.1503  
7.1486  
7.1469  
7.1452  
7.1375  
7.1361  
7.1255  
7.1238  
7.1152  
7.1130  
7.1111  
7.1096  
7.1073  
7.1037  
7.1022  
7.1005  
7.0985  
7.0966

7.0066  
7.0045  
7.0025  
7.0011  
6.9990  
6.9954  
6.9937  
6.9916  
6.9900  
6.9881  
6.9849  
6.9835  
6.9818  
6.9766  
6.9755

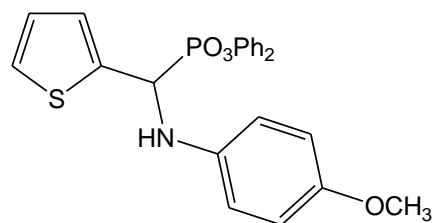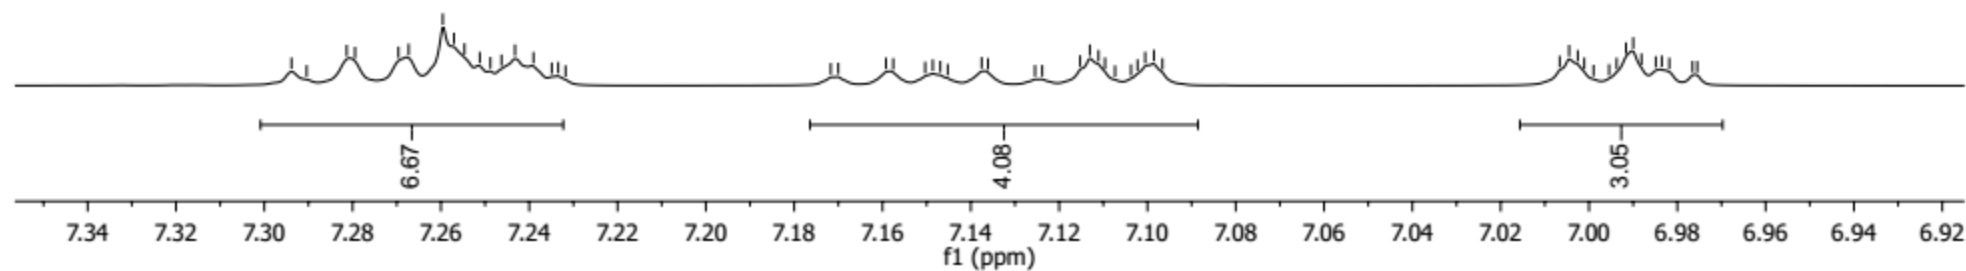

—6.7703  
—6.7665  
—6.7593  
—6.7554

—6.6847  
—6.6807  
—6.6735  
—6.6697

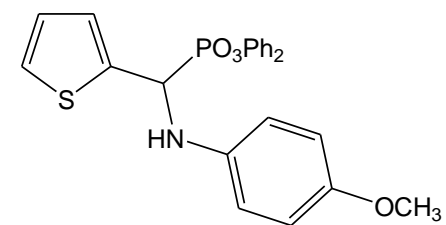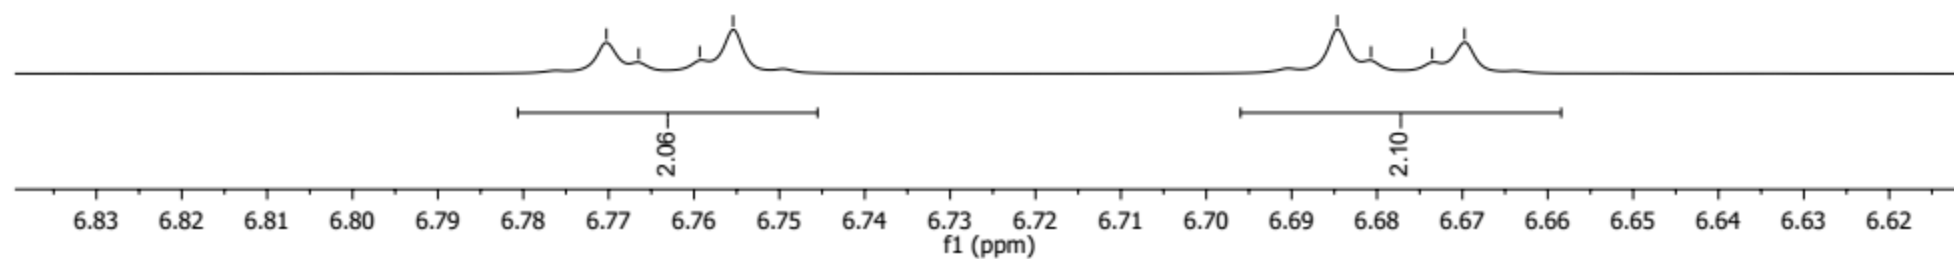

drt-60000f/10

—5.3368  
—5.2973

—4.4122

—3.7320

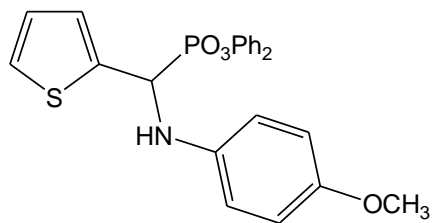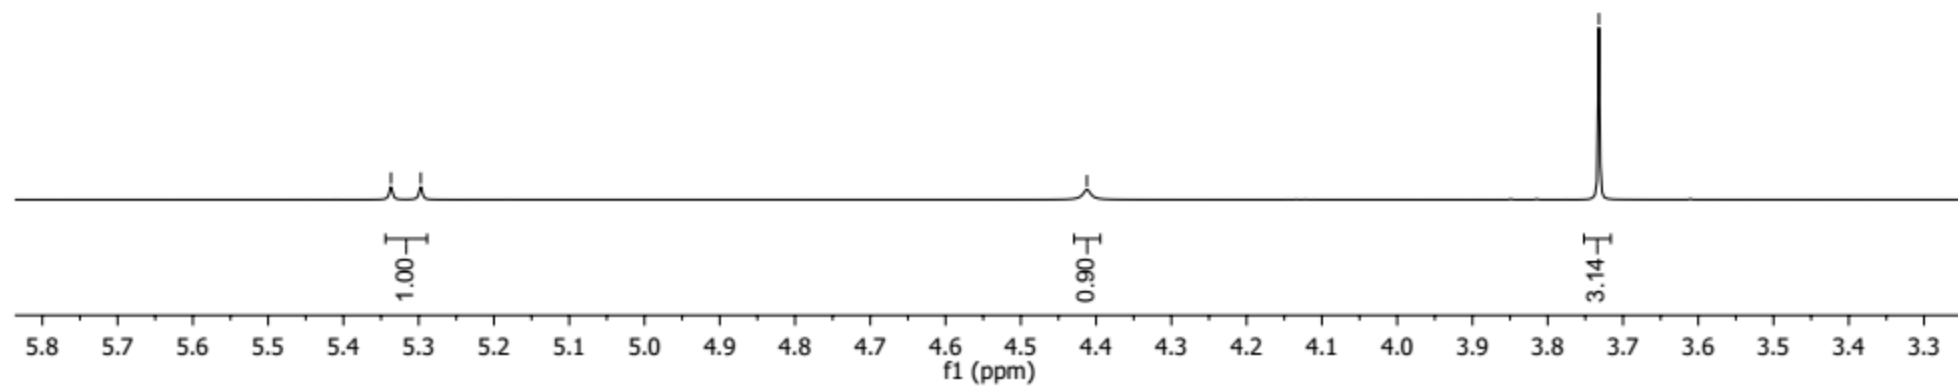

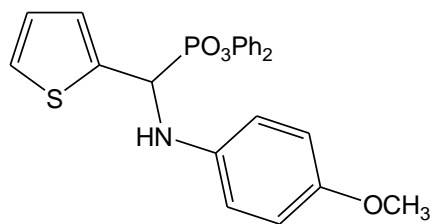

—13.5207

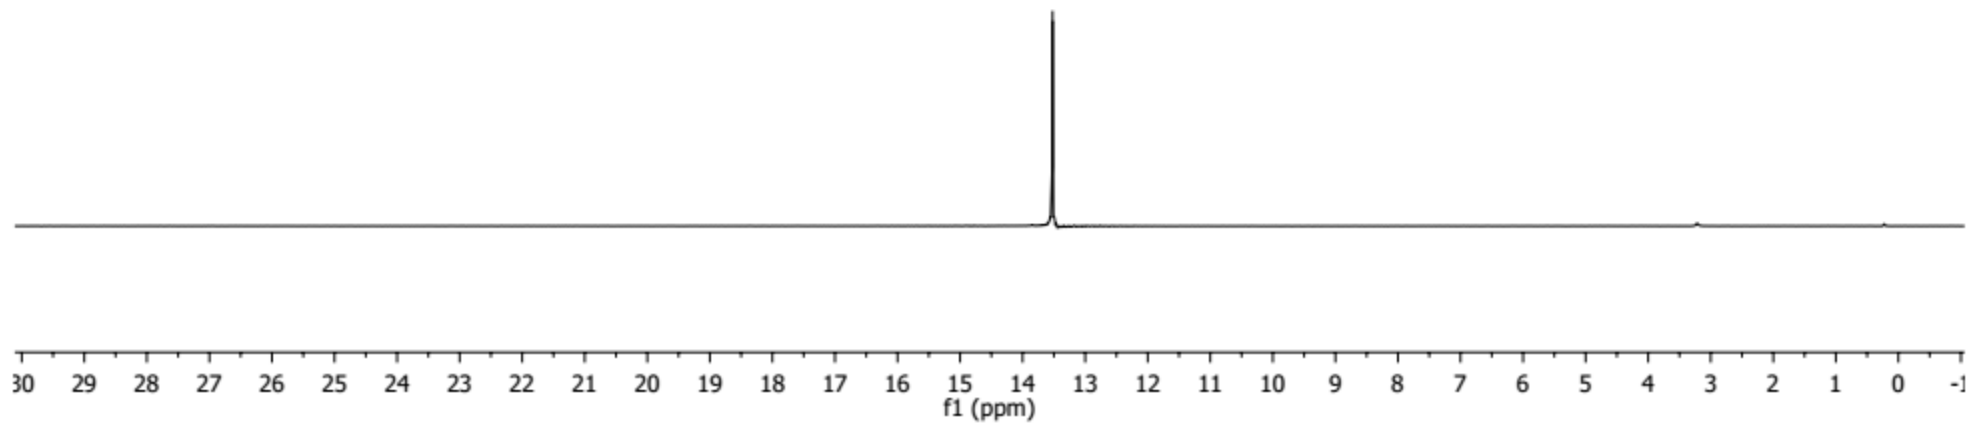



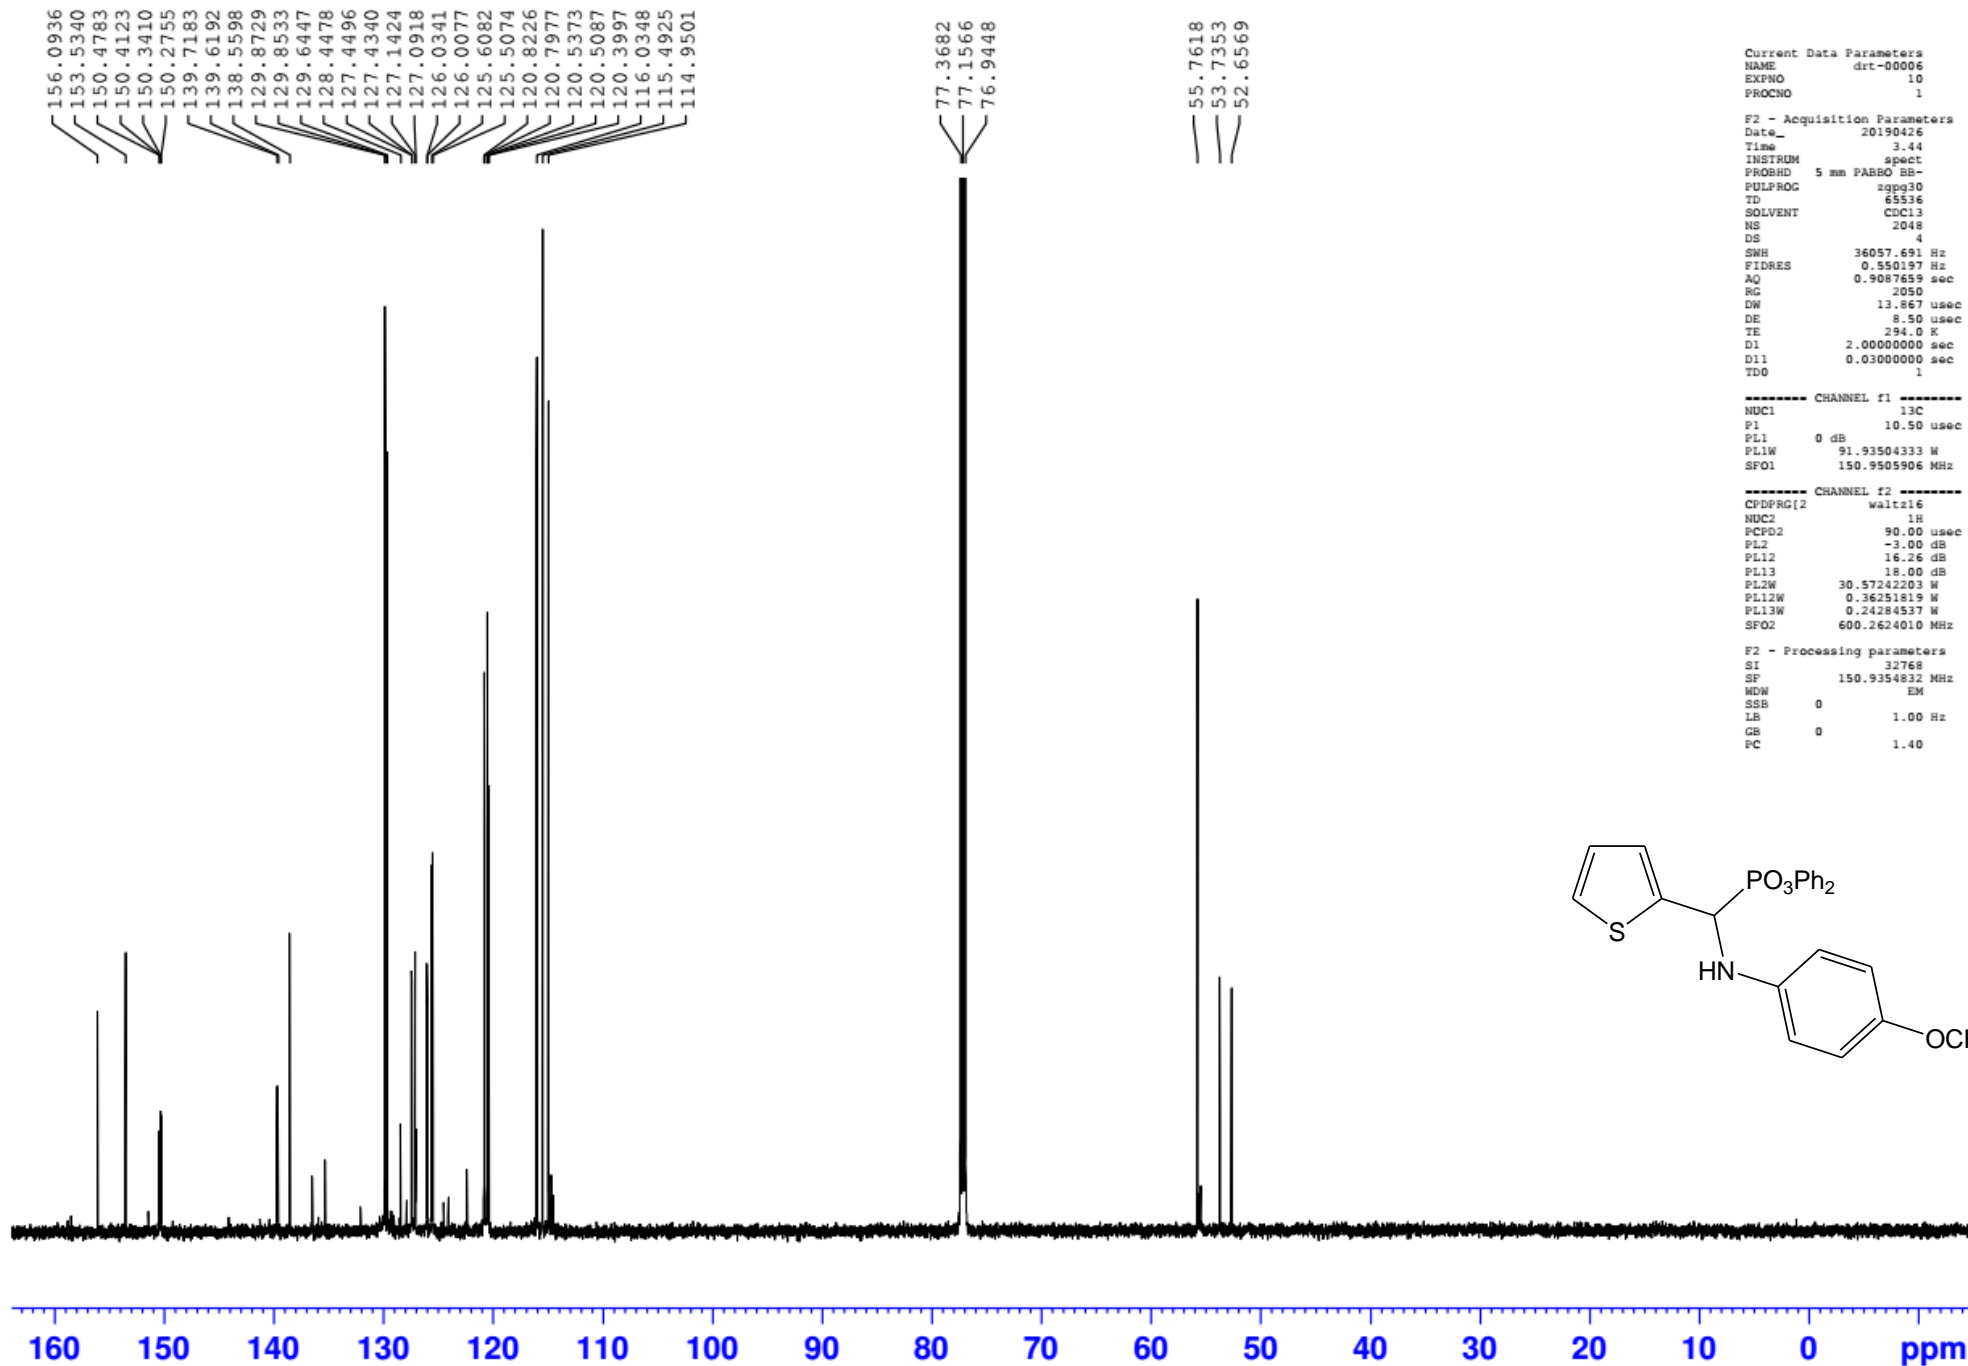

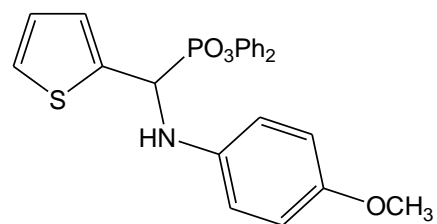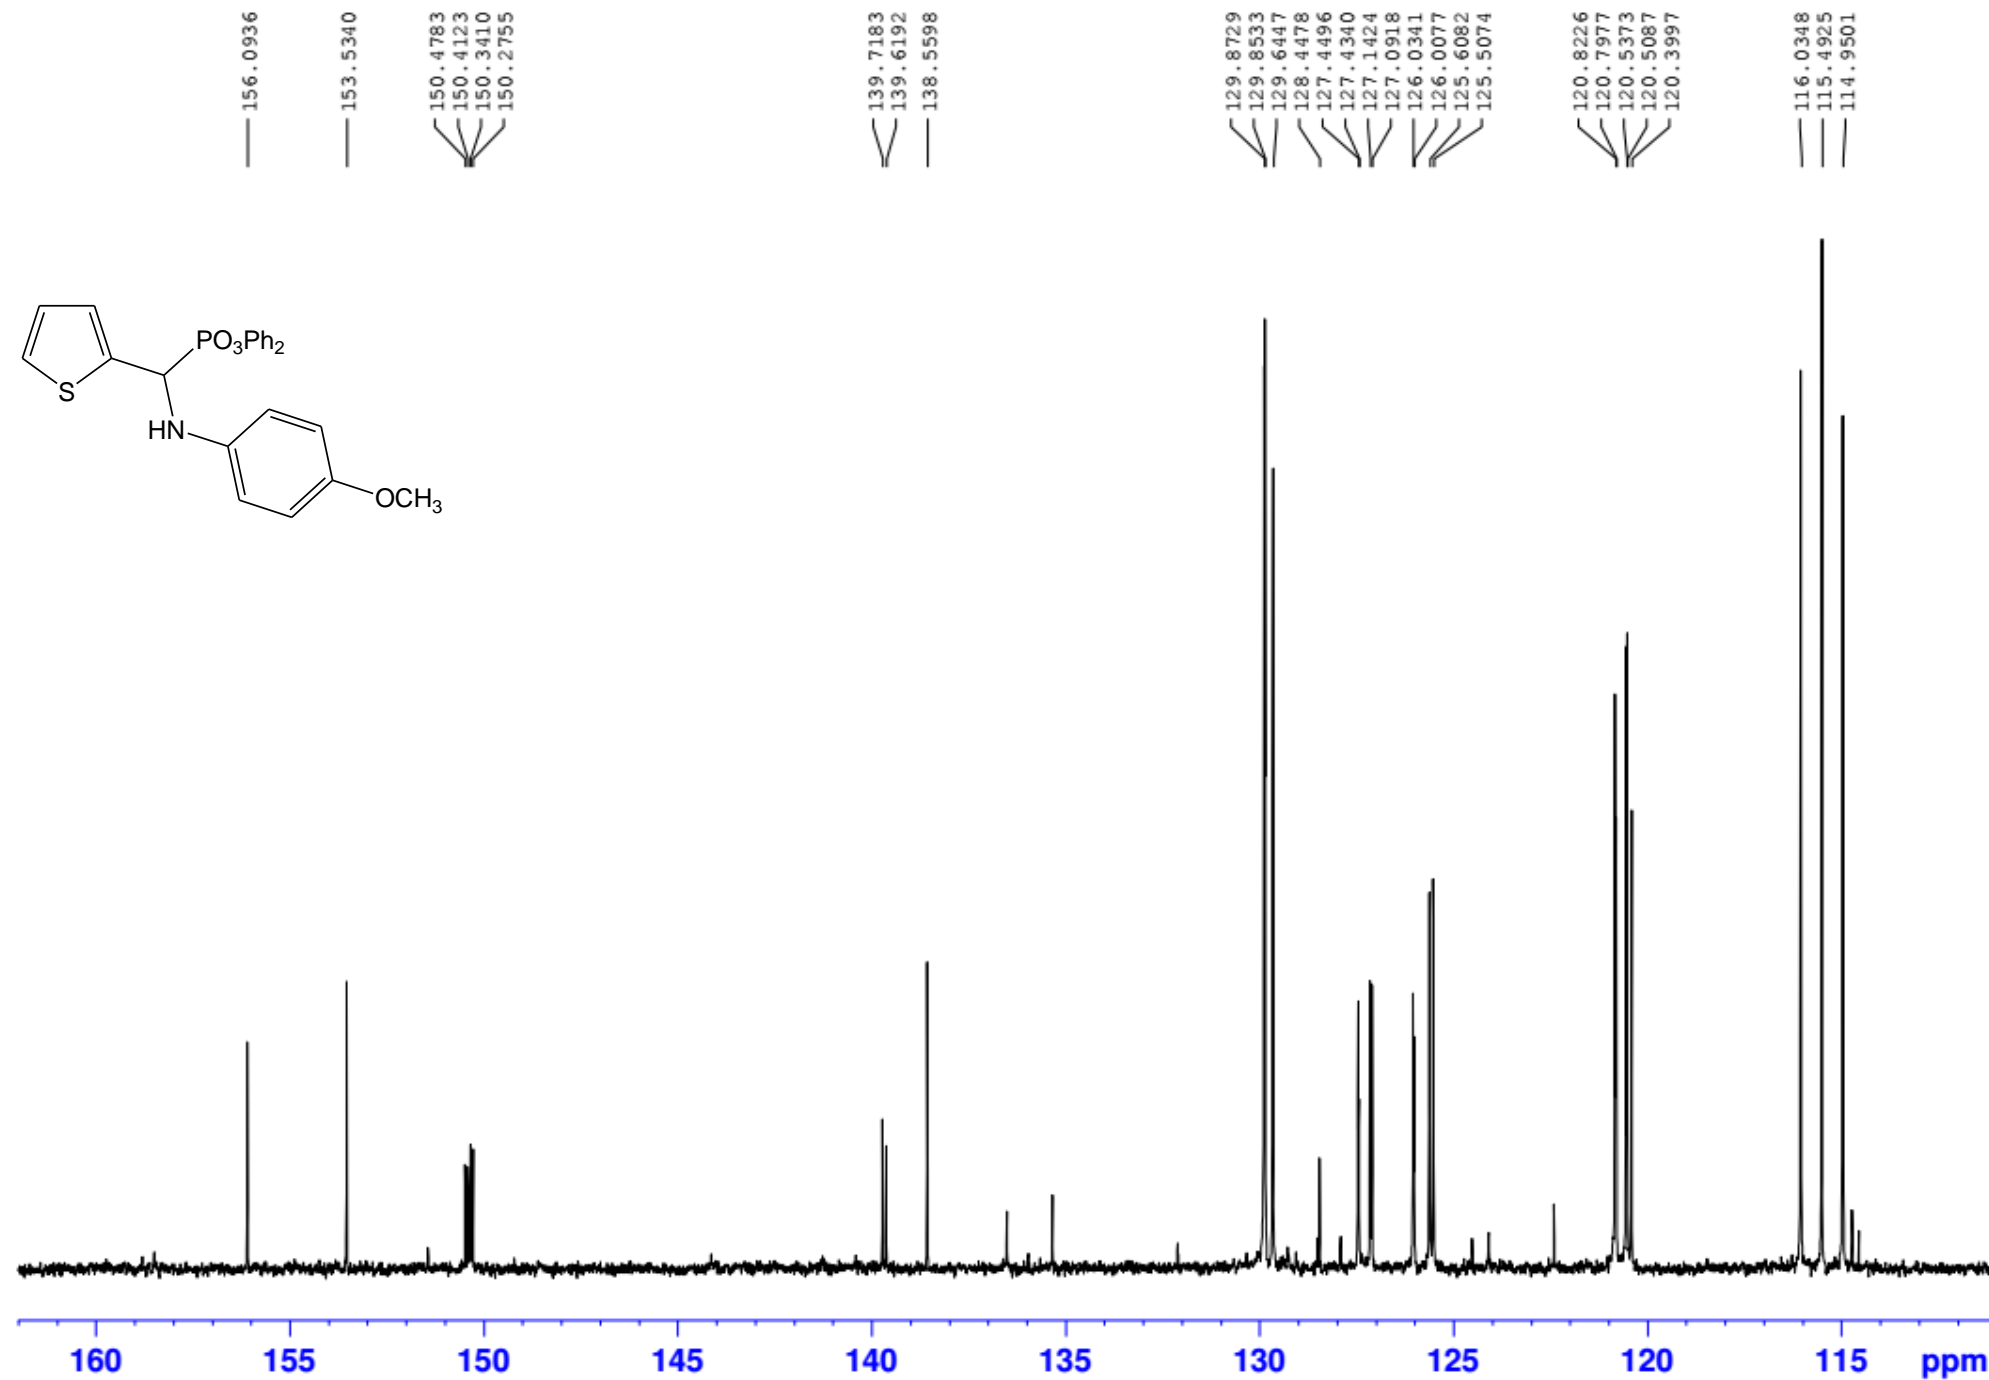

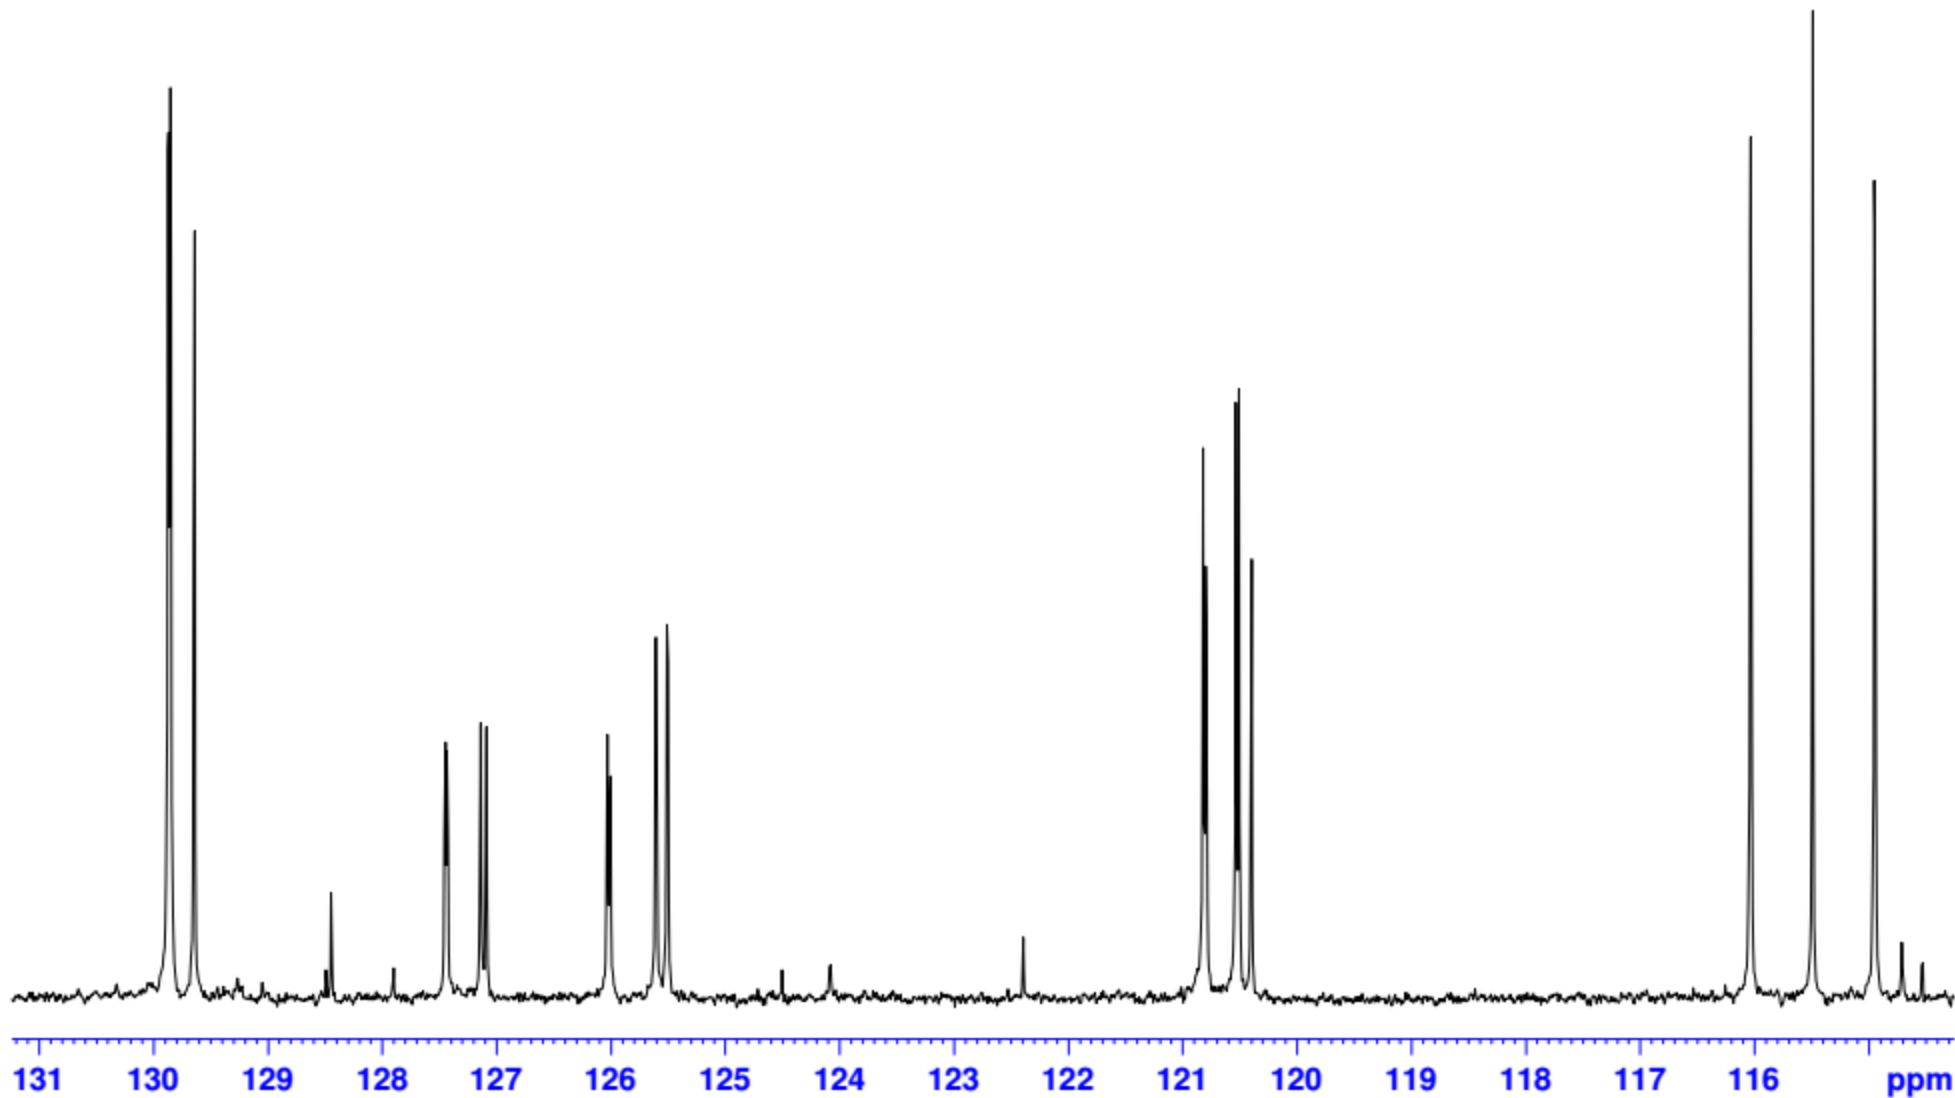

Supplement: s1 [file s1]
